# Supplementary material for: Correction: Biologically anchored knowledge expansion approach uncovers KLF4 as a novel insulin signaling regulator
Source: PubMed Central journal article supplement (PMC6221346; doi:10.1371/journal.pone.0207325), 2018-11-07
Supplement: pone.0207325.s001.pdf [file pone.0207325.s001.pdf]

**S2 Table. L<sub>0</sub> and L<sub>1</sub> Genes**

| L <sub>0</sub> Genes |               |                                                         |                      |
|----------------------|---------------|---------------------------------------------------------|----------------------|
| Probe Set ID         | Gene Symbol   | Gene Title                                              | L <sub>1</sub> Genes |
| 1452925_a_at         | MARCH5        | membrane-associated ring finger (C3HC4) 5               | L1                   |
| 1438678_at           | 1500011K16Rik | RIKEN cDNA 1500011K16 gene                              |                      |
| 1428732_at           | 1700008J07Rik | RIKEN cDNA 1700008J07 gene                              | L1                   |
| 1453294_at           | 1700012B15Rik | RIKEN cDNA 1700012B15 gene                              | L1                   |
| 1441871_at           | 1810044D09Rik | RIKEN cDNA 1810044D09 gene                              |                      |
| 1429115_at           | 2010003O02Rik | RIKEN cDNA 2010003O02 gene                              | L1                   |
| 1432607_at           | 2610012C04Rik | RIKEN cDNA 2610012C04 gene                              | L1                   |
| 1453745_at           | 2700038G22Rik | RIKEN cDNA 2700038G22 gene                              | L1                   |
| 1436235_x_at         | 4732471D19Rik | RIKEN cDNA 4732471D19 gene                              |                      |
| 1427326_at           | 4732471D19Rik | RIKEN cDNA 4732471D19 gene                              | L1                   |
| 1431580_at           | 4833421K07Rik | RIKEN cDNA 4833421K07 gene                              |                      |
| 1433142_at           | 4921504P05Rik | RIKEN cDNA 4921504P05 gene                              | L1                   |
| 1429880_at           | 4921531C22Rik | RIKEN cDNA 4921531C22 gene                              |                      |
| 1453390_at           | 4930428F12Rik | RIKEN cDNA 4930428F12 gene                              | L1                   |
| 1433197_at           | 4930445B03Rik | RIKEN cDNA 4930445B03 gene                              | L1                   |
| 1433082_at           | 4930448K20Rik | glyceraldehyde-3-phosphate dehydrogenase pseudogene     |                      |
| 1431634_at           | 4930455C13Rik | RIKEN cDNA 4930455C13 gene                              | L1                   |
| 1430175_at           | 4930588G05Rik | RIKEN cDNA 4930588G05 gene                              |                      |
| 1432626_at           | 5730507A11Rik | RIKEN cDNA 5730507A11 gene                              | L1                   |
| 1430646_at           | 5830407P18Rik | RIKEN cDNA 5830407P18 gene                              | L1                   |
| 1433685_a_at         | 6430706D22Rik | RIKEN cDNA 6430706D22 gene                              | L1                   |
| 1432680_at           | 9130009M17Rik | RIKEN cDNA 9130009M17 gene                              | L1                   |
| 1438299_at           | 9230108I15Rik | RIKEN cDNA 9230108I15 gene                              |                      |
| 1439874_at           | 9330102E08Rik | RIKEN cDNA 9330102E08 gene                              | L1                   |
| 1454592_at           | 9430012M22Rik | RIKEN cDNA 9430012M22 gene                              |                      |
| 1456758_at           | 9930017N22Rik | RIKEN cDNA 9930017N22 gene                              | L1                   |
| 1457517_at           | A730046G19Rik | RIKEN cDNA A730046G19 gene                              |                      |
| 1439110_at           | A930012O16Rik | RIKEN cDNA A930012O16 gene                              | L1                   |
| 1436942_at           | A930035D04Rik | RIKEN cDNA A930035D04 gene                              |                      |
| 1444070_at           | AA914427      | EST AA914427                                            |                      |
| 1452233_at           | ABCC1         | ATP-binding cassette, sub-family C (CFTR/MRP), member 1 | L1                   |
| 1439835_x_at         | ABCD2         | ATP-binding cassette, sub-family D (ALD), member 2      |                      |
| 1416014_at           | ABCE1         | ATP-binding cassette, sub-family E (OABP), member 1     | L1                   |

|              |         |                                                            |    |
|--------------|---------|------------------------------------------------------------|----|
| 1452236_at   | ABCF1   | ATP-binding cassette, sub-family F (GCN20), member 1       |    |
| 1423570_at   | ABCG1   | ATP-binding cassette, sub-family G (WHITE), member 1       |    |
| 1427959_at   | ABHD10  | abhydrolase domain containing 10                           | L1 |
| 1418661_at   | ABHD2   | abhydrolase domain containing 2                            |    |
| 1417946_at   | ABHD3   | abhydrolase domain containing 3                            | L1 |
| 1455313_at   | ABLIM2  | actin binding LIM protein family, member 2                 | L1 |
| 1427595_at   | ACACA   | acetyl-CoA carboxylase alpha                               |    |
| 1453206_at   | ACAD9   | acyl-CoA dehydrogenase family, member 9                    |    |
| 1423644_at   | ACO1    | aconitase 1, soluble                                       | L1 |
| 1431609_a_at | ACP5    | acid phosphatase 5, tartrate resistant                     |    |
| 1448445_at   | ACP6    | acid phosphatase 6, lysophosphatidic                       | L1 |
| 1460316_at   | ACSL1   | acyl-CoA synthetase long-chain family member 1             | L1 |
| 1427735_a_at | ACTA1   | actin, alpha 1, skeletal muscle                            |    |
| 1416569_at   | ACTL6A  | actin-like 6A                                              | L1 |
| 1423449_a_at | ACTN4   | actinin, alpha 4                                           | L1 |
| 1417157_at   | ACTR10  | actin-related protein 10 homolog ( <i>S. cerevisiae</i> )  | L1 |
| 1422561_at   | ADAMTS5 | ADAM metalloproteinase with thrombospondin type 1 motif, 5 |    |
| 1433556_at   | ADAP1   | ArfGAP with dual PH domains 1                              | L1 |
| 1439613_at   | ADCY10  | adenylate cyclase 10 (soluble)                             |    |
| 1419811_at   | ADCY9   | adenylate cyclase 9                                        | L1 |
| 1434454_at   | ADCY9   | adenylate cyclase 9                                        | L1 |
| 1420953_at   | ADD1    | adducin 1 (alpha)                                          | L1 |
| 1441094_at   | Adh6b   | alcohol dehydrogenase 6B (class V)                         |    |
| 1434329_s_at | ADIPOR2 | adiponectin receptor 2                                     | L1 |
| 1416319_at   | ADK     | adenosine kinase                                           | L1 |
| 1450214_at   | ADORA2B | adenosine A2b receptor                                     | L1 |
| 1451992_at   | ADRBK1  | adrenergic, beta, receptor kinase 1                        | L1 |
| 1418372_at   | ADSL    | adenylosuccinate lyase                                     | L1 |
| 1454727_at   | AFAP1L1 | actin filament associated protein 1-like 1                 | L1 |

|              |                 |                                                                                                   |    |
|--------------|-----------------|---------------------------------------------------------------------------------------------------|----|
| 1426923_at   | AGFG1           | ArfGAP with FG repeats 1                                                                          | L1 |
| 1452237_at   | AGFG1           | ArfGAP with FG repeats 1                                                                          | L1 |
| 1435591_at   | AI426330        | expressed sequence AI426330                                                                       | L1 |
| 1442197_at   | AI480624        | expressed sequence AI480624                                                                       |    |
| 1456399_at   | AI842136        | expressed sequence AI842136                                                                       | L1 |
| 1443923_at   | AKAP13          | A kinase (PRKA) anchor protein 13                                                                 | L1 |
| 1447912_x_at | AKAP9           | A kinase (PRKA) anchor protein (yotiao) 9                                                         | L1 |
| 1448894_at   | AKR1B10         | aldo-keto reductase family 1, member B10 (aldose reductase)                                       | L1 |
| 1428158_at   | AKT1S1          | AKT1 substrate 1 (proline-rich)                                                                   | L1 |
| 1426300_at   | ALCAM           | activated leukocyte cell adhesion molecule                                                        |    |
| 1418844_at   | ALG9            | asparagine-linked glycosylation 9, alpha-1,2-mannosyltransferase homolog ( <i>S. cerevisiae</i> ) |    |
| 1434660_at   | ALKBH1          | alkB, alkylation repair homolog 1 ( <i>E. coli</i> )                                              | L1 |
| 1428904_at   | AMMECR1L        | AMME chromosomal region gene 1-like                                                               | L1 |
| 1422573_at   | AMPD3           | adenosine monophosphate deaminase 3                                                               | L1 |
| 1415707_at   | ANAPC2          | anaphase promoting complex subunit 2                                                              |    |
| 1448008_at   | ANKHD1-EIF4EBP3 | ANKHD1-EIF4EBP3 readthrough                                                                       | L1 |
| 1435778_at   | ANKRD11         | ankyrin repeat domain 11                                                                          | L1 |
| 1436967_at   | ANKRD11         | ankyrin repeat domain 11                                                                          | L1 |
| 1437633_at   | ANKRD11         | ankyrin repeat domain 11                                                                          | L1 |
| 1456110_at   | ANKRD11         | ankyrin repeat domain 11                                                                          | L1 |
| 1443867_at   | ANKRD12         | ankyrin repeat domain 12                                                                          | L1 |
| 1428239_at   | ANKRD16         | ankyrin repeat domain 16                                                                          | L1 |
| 1444016_at   | ANXA1           | annexin A1                                                                                        | L1 |
| 1416307_at   | AP1M1           | adaptor-related protein complex 1, mu 1 subunit                                                   | L1 |
| 1426719_at   | APBB2           | amyloid beta (A4) precursor protein-binding, family B, member 2                                   | L1 |
| 1424980_s_at | APH1A           | anterior pharynx defective 1 homolog A ( <i>C. elegans</i> )                                      | L1 |

|              |            |                                                        |    |
|--------------|------------|--------------------------------------------------------|----|
| 1421887_a_at | APLP2      | amyloid beta (A4) precursor-like protein 2             | L1 |
| 1423739_x_at | APLP2      | amyloid beta (A4) precursor-like protein 2             | L1 |
| 1416371_at   | APOD       | apolipoprotein D                                       |    |
| 1452800_a_at | APOO       | apolipoprotein O                                       | L1 |
| 1429248_at   | APOPT1     | apoptogenic 1, mitochondrial                           | L1 |
| 1416203_at   | AQP1       | aquaporin 1 (Colton blood group)                       | L1 |
| 1418687_at   | ARC        | activity-regulated cytoskeleton-associated protein     | L1 |
| 1421134_at   | AREG/AREGB | amphiregulin                                           | L1 |
| 1423052_at   | ARF4       | ADP-ribosylation factor 4                              | L1 |
| 1423053_at   | ARF4       | ADP-ribosylation factor 4                              | L1 |
| 1426534_a_at | ARFGAP3    | ADP-ribosylation factor GTPase activating protein 3    | L1 |
| 1424240_at   | ARFIP2     | ADP-ribosylation factor interacting protein 2          | L1 |
| 1451309_at   | ARHGAP1    | Rho GTPase activating protein 1                        | L1 |
| 1431133_at   | ARHGAP18   | Rho GTPase activating protein 18                       | L1 |
| 1423194_at   | ARHGAP5    | Rho GTPase activating protein 5                        | L1 |
| 1419457_at   | ARHGEF28   | Rho guanine nucleotide exchange factor (GEF) 28        | L1 |
| 1436725_at   | ARHGEF39   | Rho guanine nucleotide exchange factor (GEF) 39        |    |
| 1436768_x_at | ARHGEF40   | Rho guanine nucleotide exchange factor (GEF) 40        |    |
| 1455810_a_at | ARHGEF40   | Rho guanine nucleotide exchange factor (GEF) 40        |    |
| 1431024_a_at | ARID4B     | AT rich interactive domain 4B (RBP1-like)              |    |
| 1451847_s_at | ARID4B     | AT rich interactive domain 4B (RBP1-like)              | L1 |
| 1420973_at   | ARID5B     | AT rich interactive domain 5B (MRF1-like)              | L1 |
| 1417331_a_at | ARL6       | ADP-ribosylation factor-like 6                         | L1 |
| 1425914_a_at | ARMCX1     | armadillo repeat containing, X-linked 1                |    |
| 1416226_at   | ARPC1B     | actin related protein 2/3 complex, subunit 1B, 41kDa   | L1 |
| 1425572_a_at | ASAP1      | ArfGAP with SH3 domain, ankyrin repeat and PH domain 1 |    |

|              |                    |                                                                           |    |
|--------------|--------------------|---------------------------------------------------------------------------|----|
| 1425573_a_at | ASAP1              | ArfGAP with SH3 domain, ankyrin repeat and PH domain 1                    |    |
| 1417361_at   | ASB3/GPR75-ASB3    | ankyrin repeat and SOCS box containing 3                                  | L1 |
| 1437086_at   | ASCL1              | achaete-scute complex homolog 1 (Drosophila)                              |    |
| 1425274_at   | ASPH               | aspartate beta-hydroxylase                                                |    |
| 1450058_at   | ASPH               | aspartate beta-hydroxylase                                                |    |
| 1435077_at   | ASXL1              | additional sex combs like 1 (Drosophila)                                  | L1 |
| 1446838_at   | ATAD1              | ATPase family, AAA domain containing 1                                    |    |
| 1429396_at   | ATG16L2            | autophagy related 16-like 2 (S. cerevisiae)                               | L1 |
| 1428260_at   | ATL1               | atlastin GTPase 1                                                         | L1 |
| 1447851_x_at | ATP10A             | ATPase, class V, type 10A                                                 | L1 |
| 1456388_at   | ATP11A             | ATPase, class VI, type 11A                                                |    |
| 1427481_a_at | ATP1A3             | ATPase, Na <sup>+</sup> /K <sup>+</sup> transporting, alpha 3 polypeptide |    |
| 1416551_at   | ATP2A2             | ATPase, Ca <sup>++</sup> transporting, cardiac muscle, slow twitch 2      |    |
| 1427251_at   | ATP2A2             | ATPase, Ca <sup>++</sup> transporting, cardiac muscle, slow twitch 2      | L1 |
| 1452363_a_at | ATP2A2             | ATPase, Ca <sup>++</sup> transporting, cardiac muscle, slow twitch 2      | L1 |
| 1416391_at   | ATP5J2-PTCD1/PTCD1 | pentatricopeptide repeat domain 1                                         |    |
| 1420947_at   | ATRX               | alpha thalassemia/mental retardation syndrome X-linked                    |    |
| 1420946_at   | ATRX               | alpha thalassemia/mental retardation syndrome X-linked                    | L1 |
| 1422576_at   | ATXN10             | ataxin 10                                                                 | L1 |
| 1419866_s_at | ATXN2              | ataxin 2                                                                  | L1 |
| 1460653_at   | ATXN2              | ataxin 2                                                                  | L1 |
| 1439497_at   | ATXN7L1            | ataxin 7-like 1                                                           | L1 |
| 1455492_at   | B330016D10Rik      | RIKEN cDNA B330016D10 gene                                                |    |
| 1423084_at   | B3GALT2            | UDP-Gal:betaGlcNAc beta 1,3-galactosyltransferase, polypeptide 2          |    |
| 1425934_a_at | B4GALT4            | UDP-Gal:betaGlcNAc beta 1,4-galactosyltransferase, polypeptide 4          | L1 |

|              |          |                                                                            |    |
|--------------|----------|----------------------------------------------------------------------------|----|
| 1421824_at   | BACE1    | beta-site APP-cleaving enzyme 1                                            | L1 |
| 1425656_a_at | BAIAP2   | BAI1-associated protein 2                                                  | L1 |
| 1451539_at   | BAIAP2L1 | BAI1-associated protein 2-like 1                                           |    |
| 1423753_at   | BAMBI    | BMP and activin membrane-bound inhibitor homolog ( <i>Xenopus laevis</i> ) | L1 |
| 1426354_at   | BAP1     | BRCA1 associated protein-1 (ubiquitin carboxy-terminal hydrolase)          | L1 |
| 1433599_at   | BAZ1A    | bromodomain adjacent to zinc finger domain, 1A                             | L1 |
| 1440805_at   | BAZ1B    | bromodomain adjacent to zinc finger domain, 1B                             |    |
| 1454684_at   | BBS7     | Bardet-Biedl syndrome 7                                                    | L1 |
| 1439388_s_at | BCAR1    | breast cancer anti-estrogen resistance 1                                   | L1 |
| 1450622_at   | BCAR1    | breast cancer anti-estrogen resistance 1                                   | L1 |
| 1415936_at   | BCAR3    | breast cancer anti-estrogen resistance 3                                   |    |
| 1418971_x_at | BCL10    | B-cell CLL/lymphoma 10                                                     |    |
| 1418970_a_at | BCL10    | B-cell CLL/lymphoma 10                                                     | L1 |
| 1418972_at   | BCL10    | B-cell CLL/lymphoma 10                                                     | L1 |
| 1424406_at   | BCL2L13  | BCL2-like 13 (apoptosis facilitator)                                       | L1 |
| 1436023_at   | BCLAF1   | BCL2-associated transcription factor 1                                     | L1 |
| 1454172_at   | BCORL1   | BCL6 corepressor-like 1                                                    |    |
| 1430549_at   | BET1L    | blocked early in transport 1 homolog ( <i>S. cerevisiae</i> )-like         |    |
| 1427488_a_at | BIRC6    | baculoviral IAP repeat containing 6                                        |    |
| 1420631_a_at | BLCAP    | bladder cancer associated protein                                          | L1 |
| 1426238_at   | BMP1     | bone morphogenetic protein 1                                               | L1 |
| 1421103_at   | BMP2K    | BMP2 inducible kinase                                                      | L1 |
| 1422912_at   | BMP4     | bone morphogenetic protein 4                                               | L1 |
| 1419616_at   | BMPR2    | bone morphogenetic protein receptor, type II (serine/threonine kinase)     |    |
| 1428669_at   | Bmyc     | brain expressed myelocytomatosis oncogene                                  |    |

|              |           |                                                             |    |
|--------------|-----------|-------------------------------------------------------------|----|
| 1426869_at   | BOC       | Boc homolog (mouse)                                         | L1 |
| 1460005_at   | BOD1L1    | biorientation of chromosomes in cell division 1-like 1      | L1 |
| 1417040_a_at | BOK       | BCL2-related ovarian killer                                 | L1 |
| 1418378_at   | BPIFB2    | BPI fold containing family B, member 2                      |    |
| 1427311_at   | BPTF      | bromodomain PHD finger transcription factor                 | L1 |
| 1438771_at   | BRD1      | bromodomain containing 1                                    | L1 |
| 1427192_a_at | BRD8      | bromodomain containing 8                                    | L1 |
| 1451137_a_at | BRD8      | bromodomain containing 8                                    | L1 |
| 1426312_at   | BRE       | brain and reproductive organ-expressed (TNFRSF1A modulator) | L1 |
| 1435153_at   | BTBD6     | BTB (POZ) domain containing 6                               | L1 |
| 1432910_at   | BTBD7     | BTB (POZ) domain containing 7                               |    |
| 1431230_a_at | BTBD9     | BTB (POZ) domain containing 9                               | L1 |
| 1449007_at   | BTG3      | BTG family, member 3                                        | L1 |
| 1428632_at   | C11orf10  | chromosome 11 open reading frame 10                         | L1 |
| 1439859_at   | C12orf5   | chromosome 12 open reading frame 5                          | L1 |
| 1430095_at   | C12orf56  | chromosome 12 open reading frame 56                         |    |
| 1451303_at   | C14orf102 | chromosome 14 open reading frame 102                        | L1 |
| 1416917_at   | C14orf119 | chromosome 14 open reading frame 119                        | L1 |
| 1428450_at   | C15orf38  | chromosome 15 open reading frame 38                         | L1 |
| 1426347_at   | C15orf44  | chromosome 15 open reading frame 44                         | L1 |
| 1426828_at   | C16orf7   | chromosome 16 open reading frame 7                          | L1 |
| 1452896_at   | C16orf80  | chromosome 16 open reading frame 80                         | L1 |
| 1420548_a_at | C16orf88  | chromosome 16 open reading frame 88                         | L1 |
| 1428809_at   | C17orf58  | chromosome 17 open reading frame 58                         | L1 |
| 1416886_at   | C1D       | C1D nuclear receptor corepressor                            | L1 |

|              |           |                                                                                  |    |
|--------------|-----------|----------------------------------------------------------------------------------|----|
| 1419174_at   | C1orf52   | chromosome 1 open reading frame 52                                               | L1 |
| 1416051_at   | C2        | complement component 2                                                           | L1 |
| 1457664_x_at | C2        | complement component 2                                                           | L1 |
| 1438038_at   | C20orf194 | chromosome 20 open reading frame 194                                             | L1 |
| 1424724_a_at | C21orf91  | chromosome 21 open reading frame 91                                              | L1 |
| 1428085_at   | C2orf43   | chromosome 2 open reading frame 43                                               | L1 |
| 1437439_at   | C5orf42   | chromosome 5 open reading frame 42                                               | L1 |
| 1423306_at   | C5orf62   | chromosome 5 open reading frame 62                                               | L1 |
| 1428217_at   | C6orf120  | chromosome 6 open reading frame 120                                              |    |
| 1453818_a_at | C6orf70   | chromosome 6 open reading frame 70                                               | L1 |
| 1458879_at   | C76798    | expressed sequence C76798                                                        |    |
| 1429451_at   | C8orf37   | chromosome 8 open reading frame 37                                               | L1 |
| 1423879_at   | C9orf40   | chromosome 9 open reading frame 40                                               |    |
| 1452307_at   | CABLES2   | Cdk5 and Abl enzyme substrate 2                                                  | L1 |
| 1436031_at   | CACHD1    | cache domain containing 1                                                        |    |
| 1452829_at   | CAD       | carbamoyl-phosphate synthetase 2, aspartate transcarbamylase, and dihydroorotase | L1 |
| 1427763_a_at | CAMK2D    | calcium/calmodulin-dependent protein kinase II delta                             | L1 |
| 1455751_at   | CAND1     | cullin-associated and neddylation-dissociated 1                                  | L1 |
| 1427944_at   | CAPRN2    | caprin family member 2                                                           |    |
| 1452038_at   | CAPZA1    | capping protein (actin filament) muscle Z-line, alpha 1                          | L1 |
| 1455886_at   | CBL       | Cbl proto-oncogene, E3 ubiquitin protein ligase                                  | L1 |
| 1451531_at   | CBWD1     | COBW domain containing 1                                                         | L1 |
| 1421933_at   | CBX5      | chromobox homolog 5                                                              |    |
| 1451442_at   | CCDC104   | coiled-coil domain containing 104                                                | L1 |



|              |            |                                                                                                |    |
|--------------|------------|------------------------------------------------------------------------------------------------|----|
| 1432094_a_at | CCDC132    | coiled-coil domain containing 132                                                              | L1 |
| 1428261_at   | CCDC134    | coiled-coil domain containing 134                                                              |    |
| 1452721_a_at | CCDC53     | coiled-coil domain containing 53                                                               | L1 |
| 1424187_at   | CCDC80     | coiled-coil domain containing 80                                                               |    |
| 1427138_at   | CCDC88C    | coiled-coil domain containing 88C                                                              | L1 |
| 1428505_at   | CCDC90B    | coiled-coil domain containing 90B                                                              | L1 |
| 1417789_at   | CCL11      | chemokine (C-C motif) ligand 11                                                                | L1 |
| 1420380_at   | CCL13      | chemokine (C-C motif) ligand 13                                                                |    |
| 1423622_a_at | CCNL1      | cyclin L1                                                                                      | L1 |
| 1432195_s_at | CCNL2      | cyclin L2                                                                                      | L1 |
| 1428413_at   | CCNY       | cyclin Y                                                                                       | L1 |
| 1433554_at   | CCZ1/CCZ1B | CCZ1 vacuolar protein trafficking and biogenesis associated homolog B ( <i>S. cerevisiae</i> ) | L1 |
| 1422105_at   | CD3E       | CD3e molecule, epsilon (CD3-TCR complex)                                                       | L1 |
| 1419554_at   | CD47       | CD47 molecule                                                                                  | L1 |
| 1449507_a_at | CD47       | CD47 molecule                                                                                  | L1 |
| 1456046_at   | CD93       | CD93 molecule                                                                                  |    |
| 1456746_a_at | Cd99I2     | CD99 antigen-like 2                                                                            | L1 |
| 1456747_x_at | Cd99I2     | CD99 antigen-like 2                                                                            | L1 |
| 1425556_at   | CDK12      | cyclin-dependent kinase 12                                                                     |    |
| 1455567_at   | CDK12      | cyclin-dependent kinase 12                                                                     | L1 |
| 1415956_a_at | CDK16      | cyclin-dependent kinase 16                                                                     | L1 |
| 1426885_a_at | CDK2AP1    | cyclin-dependent kinase 2 associated protein 1                                                 | L1 |
| 1450674_at   | CDK5       | cyclin-dependent kinase 5                                                                      | L1 |
| 1457625_s_at | CDKL2      | cyclin-dependent kinase-like 2 (CDC2-related kinase)                                           |    |
| 1417649_at   | CDKN1C     | cyclin-dependent kinase inhibitor 1C (p57, Kip2)                                               |    |
| 1418982_at   | CEBPA      | CCAAT/enhancer binding protein (C/EBP), alpha                                                  | L1 |
| 1427413_a_at | CELF1      | CUGBP, Elav-like family member 1                                                               |    |
| 1429326_at   | CENPL      | centromere protein L                                                                           | L1 |
| 1452470_at   | CEP350     | centrosomal protein 350kDa                                                                     |    |
| 1437209_at   | CEP76      | centrosomal protein 76kDa                                                                      | L1 |

|              |         |                                                                       |    |
|--------------|---------|-----------------------------------------------------------------------|----|
| 1429670_a_at | CEP97   | centrosomal protein 97kDa                                             |    |
| 1448052_at   | CGNL1   | cingulin-like 1                                                       |    |
| 1438476_a_at | CHD4    | chromodomain helicase DNA binding protein 4                           |    |
| 1437745_at   | CHD7    | chromodomain helicase DNA binding protein 7                           | L1 |
| 1455435_s_at | CHDH    | choline dehydrogenase                                                 |    |
| 1451896_a_at | CHERP   | calcium homeostasis endoplasmic reticulum protein                     | L1 |
| 1454023_a_at | CHPF    | chondroitin polymerizing factor                                       | L1 |
| 1452170_at   | CHPF2   | chondroitin polymerizing factor 2                                     | L1 |
| 1426146_a_at | CHPT1   | choline phosphotransferase 1                                          | L1 |
| 1426866_at   | CHST14  | carbohydrate (N-acetylgalactosamine 4-O) sulfotransferase 14          |    |
| 1417091_at   | CHUK    | conserved helix-loop-helix ubiquitous kinase                          | L1 |
| 1430992_s_at | CISD2   | CDGSH iron sulfur domain 2                                            | L1 |
| 1448724_at   | CISH    | cytokine inducible SH2-containing protein                             | L1 |
| 1437271_at   | CLCF1   | cardiotrophin-like cytokine factor 1                                  | L1 |
| 1452702_at   | CLCN7   | chloride channel, voltage-sensitive 7                                 | L1 |
| 1438467_at   | CLEC10A | C-type lectin domain family 10, member A                              | L1 |
| 1456318_at   | CLEC1A  | C-type lectin domain family 1, member A                               | L1 |
| 1448250_at   | CLMP    | CXADR-like membrane protein                                           | L1 |
| 1421861_at   | CLSTN1  | calsyntenin 1                                                         | L1 |
| 1441165_s_at | CLSTN2  | calsyntenin 2                                                         |    |
| 1452597_at   | CMC2    | COX assembly mitochondrial protein 2 homolog ( <i>S. cerevisiae</i> ) | L1 |
| 1427980_at   | CMIP    | c-Maf inducing protein                                                | L1 |
| 1451114_at   | CMTM6   | CKLF-like MARVEL transmembrane domain containing 6                    | L1 |
| 1436436_at   | CNIH4   | cornichon homolog 4 ( <i>Drosophila</i> )                             |    |
| 1450981_at   | CNN2    | calponin 2                                                            | L1 |

|              |         |                                                                     |    |
|--------------|---------|---------------------------------------------------------------------|----|
| 1425480_at   | CNOT6L  | CCR4-NOT transcription complex, subunit 6-like                      | L1 |
| 1430519_a_at | CNOT7   | CCR4-NOT transcription complex, subunit 7                           | L1 |
| 1421292_a_at | COBRA1  | cofactor of BRCA1                                                   | L1 |
| 1433774_x_at | COG1    | component of oligomeric golgi complex 1                             | L1 |
| 1449053_s_at | COG1    | component of oligomeric golgi complex 1                             | L1 |
| 1416692_at   | COIL    | coilin                                                              | L1 |
| 1448755_at   | COL15A1 | collagen, type XV, alpha 1                                          | L1 |
| 1424051_at   | COL4A2  | collagen, type IV, alpha 2                                          |    |
| 1419703_at   | COL5A3  | collagen, type V, alpha 3                                           | L1 |
| 1454642_a_at | COMMD3  | COMM domain containing 3                                            | L1 |
| 1449694_s_at | COMMD5  | COMM domain containing 5                                            |    |
| 1423301_at   | COPB1   | coatamer protein complex, subunit beta 1                            | L1 |
| 1416163_at   | COPS4   | COP9 constitutive photomorphogenic homolog subunit 4 (Arabidopsis)  | L1 |
| 1423245_at   | COPS7A  | COP9 constitutive photomorphogenic homolog subunit 7A (Arabidopsis) | L1 |
| 1415934_at   | COPS8   | COP9 constitutive photomorphogenic homolog subunit 8 (Arabidopsis)  | L1 |
| 1449660_s_at | CORO1C  | coronin, actin binding protein, 1C                                  | L1 |
| 1426693_x_at | COX15   | COX15 homolog, cytochrome c oxidase assembly protein (yeast)        | L1 |
| 1418709_at   | COX7A1  | cytochrome c oxidase subunit VIIa polypeptide 1 (muscle)            |    |
| 1449218_at   | Cox8b   | cytochrome c oxidase, subunit VIIIb                                 |    |
| 1417496_at   | CP      | ceruloplasmin (ferroxidase)                                         |    |
| 1433439_at   | CPNE1   | copine I                                                            | L1 |
| 1423964_at   | CPSF3L  | cleavage and polyadenylation specific factor 3-like                 | L1 |
| 1448901_at   | CPXM1   | carboxypeptidase X (M14 family), member 1                           | L1 |
| 1456042_s_at | CRAMP1L | Crm, cramped-like (Drosophila)                                      |    |
| 1431930_x_at | CRLS1   | cardiolipin synthase 1                                              | L1 |

|              |                         |                                                                         |    |
|--------------|-------------------------|-------------------------------------------------------------------------|----|
| 1448592_at   | CRTAP                   | cartilage associated protein                                            | L1 |
| 1424660_s_at | CRTC2                   | CREB regulated transcription coactivator 2                              | L1 |
| 1429373_x_at | CRTC2                   | CREB regulated transcription coactivator 2                              | L1 |
| 1449932_at   | CSNK1D                  | casein kinase 1, delta                                                  | L1 |
| 1460646_at   | CSNK2A2                 | casein kinase 2, alpha prime polypeptide                                | L1 |
| 1422140_at   | Csprs (includes others) | component of Sp100-rs                                                   |    |
| 1415702_a_at | CTBP1                   | C-terminal binding protein 1                                            | L1 |
| 1421315_s_at | CTTN                    | cortactin                                                               | L1 |
| 1427620_at   | CUL9                    | cullin 9                                                                |    |
| 1426455_at   | CWC27                   | CWC27 spliceosome-associated protein homolog ( <i>S. cerevisiae</i> )   |    |
| 1427321_s_at | CXADR                   | coxsackie virus and adenovirus receptor                                 | L1 |
| 1448823_at   | Cxcl12                  | chemokine (C-X-C motif) ligand 12                                       |    |
| 1448859_at   | CXCL13                  | chemokine (C-X-C motif) ligand 13                                       | L1 |
| 1417767_at   | CYB5B                   | cytochrome b5 type B (outer mitochondrial membrane)                     | L1 |
| 1424048_a_at | CYB5R1                  | cytochrome b5 reductase 1                                               | L1 |
| 1426307_at   | CYB5R4                  | cytochrome b5 reductase 4                                               | L1 |
| 1449406_at   | CYHR1                   | cysteine/histidine-rich 1                                               | L1 |
| 1422217_a_at | CYP1A1                  | cytochrome P450, family 1, subfamily A, polypeptide 1                   | L1 |
| 1460011_at   | CYP26B1                 | cytochrome P450, family 26, subfamily B, polypeptide 1                  |    |
| 1425645_s_at | CYP2B6                  | cytochrome P450, family 2, subfamily B, polypeptide 6                   | L1 |
| 1419040_at   | Cyp2d22                 | cytochrome P450, family 2, subfamily d, polypeptide 22                  | L1 |
| 1458126_at   | D030041H20Rik           | RIKEN cDNA D030041H20 gene                                              |    |
| 1447526_at   | D5Ert255e               | DNA segment, Chr 5, ERATO Doi 255, expressed                            |    |
| 1433558_at   | DAB2IP                  | DAB2 interacting protein                                                | L1 |
| 1417937_at   | DACT1                   | dapper, antagonist of beta-catenin, homolog 1 ( <i>Xenopus laevis</i> ) |    |

|              |         |                                                           |    |
|--------------|---------|-----------------------------------------------------------|----|
| 1426778_at   | DAG1    | dystroglycan 1 (dystrophin-associated glycoprotein 1)     | L1 |
| 1423790_at   | DAP     | death-associated protein                                  | L1 |
| 1438727_at   | DCAF10  | DDB1 and CUL4 associated factor 10                        | L1 |
| 1430059_at   | DCAF12  | DDB1 and CUL4 associated factor 12                        | L1 |
| 1424777_at   | DCAF4   | DDB1 and CUL4 associated factor 4                         | L1 |
| 1420526_at   | DCBLD2  | discoidin, CUB and LCCL domain containing 2               | L1 |
| 1433606_at   | DCP1A   | DCP1 decapping enzyme homolog A ( <i>S. cerevisiae</i> )  | L1 |
| 1422521_at   | DCTN1   | dynactin 1                                                | L1 |
| 1420862_at   | DCTN4   | dynactin 4 (p62)                                          | L1 |
| 1429094_at   | DDI2    | DNA-damage inducible 1 homolog 2 ( <i>S. cerevisiae</i> ) |    |
| 1416071_at   | DDX18   | DEAD (Asp-Glu-Ala-Asp) box polypeptide 18                 | L1 |
| 1416751_a_at | DDX20   | DEAD (Asp-Glu-Ala-Asp) box polypeptide 20                 | L1 |
| 1423643_at   | DDX39A  | DEAD (Asp-Glu-Ala-Asp) box polypeptide 39A                | L1 |
| 1423814_at   | DDX41   | DEAD (Asp-Glu-Ala-Asp) box polypeptide 41                 | L1 |
| 1447789_x_at | DDX6    | DEAD (Asp-Glu-Ala-Asp) box helicase 6                     | L1 |
| 1451777_at   | DDX60   | DEAD (Asp-Glu-Ala-Asp) box polypeptide 60                 | L1 |
| 1423345_at   | DEGS1   | delta(4)-desaturase, sphingolipid 1                       | L1 |
| 1430406_at   | DENND1B | DENN/MADD domain containing 1B                            | L1 |
| 1428622_at   | DEPTOR  | DEP domain containing MTOR-interacting protein            | L1 |
| 1443579_s_at | DEPTOR  | DEP domain containing MTOR-interacting protein            | L1 |
| 1451348_at   | DEPTOR  | DEP domain containing MTOR-interacting protein            | L1 |
| 1433563_s_at | DERL1   | derlin 1                                                  | L1 |

|              |         |                                                                                  |    |
|--------------|---------|----------------------------------------------------------------------------------|----|
| 1437051_at   | DFFB    | DNA fragmentation factor, 40kDa, beta polypeptide (caspase-activated DNase)      |    |
| 1426738_at   | DGKZ    | diacylglycerol kinase, zeta                                                      | L1 |
| 1434004_at   | DHPS    | deoxyhypusine synthase                                                           | L1 |
| 1416140_a_at | DHX30   | DEAH (Asp-Glu-Ala-His) box polypeptide 30                                        | L1 |
| 1452693_at   | DHX35   | DEAH (Asp-Glu-Ala-His) box polypeptide 35                                        | L1 |
| 1420769_at   | DHX58   | DEXH (Asp-Glu-X-His) box polypeptide 58                                          |    |
| 1454654_at   | DIRC2   | disrupted in renal carcinoma 2                                                   | L1 |
| 1430161_at   | DLST    | dihydrolipoamide S-succinyltransferase (E2 component of 2-oxo-glutarate complex) |    |
| 1437775_at   | DLST    | dihydrolipoamide S-succinyltransferase (E2 component of 2-oxo-glutarate complex) | L1 |
| 1421544_at   | DNAH11  | dynein, axonemal, heavy chain 11                                                 | L1 |
| 1416756_at   | DNAJB1  | DnaJ (Hsp40) homolog, subfamily B, member 1                                      | L1 |
| 1447055_at   | DNAJC11 | DnaJ (Hsp40) homolog, subfamily C, member 11                                     | L1 |
| 1445337_at   | DNAJC13 | DnaJ (Hsp40) homolog, subfamily C, member 13                                     | L1 |
| 1420220_x_at | DNAJC21 | DnaJ (Hsp40) homolog, subfamily C, member 21                                     | L1 |
| 1451389_at   | DNAJC24 | DnaJ (Hsp40) homolog, subfamily C, member 24                                     | L1 |
| 1435117_a_at | DNAJC27 | DnaJ (Hsp40) homolog, subfamily C, member 27                                     |    |
| 1425035_s_at | DNMT3L  | DNA (cytosine-5-)-methyltransferase 3-like                                       |    |
| 1427881_at   | DNTTIP2 | deoxynucleotidyltransferase, terminal, interacting protein 2                     | L1 |
| 1427240_at   | DOCK6   | dedicator of cytokinesis 6                                                       | L1 |
| 1426739_at   | DONSON  | downstream neighbor of SON                                                       | L1 |

|              |               |                                                                                                               |    |
|--------------|---------------|---------------------------------------------------------------------------------------------------------------|----|
| 1448549_a_at | DPAGT1        | dolichyl-phosphate (UDP-N-acetylglucosamine) N-acetylglucosaminephosphotransferase 1 (GlcNAc-1-P transferase) | L1 |
| 1428656_at   | DROSHA        | drosha, ribonuclease type III                                                                                 | L1 |
| 1421276_a_at | DST           | dystonin                                                                                                      | L1 |
| 1417124_at   | DSTN          | destrin (actin depolymerizing factor)                                                                         | L1 |
| 1438096_a_at | DTYMK         | deoxythymidylate kinase (thymidylate kinase)                                                                  |    |
| 1424066_at   | DUS3L         | dihydrouridine synthase 3-like ( <i>S. cerevisiae</i> )                                                       | L1 |
| 1459805_x_at | DUS3L         | dihydrouridine synthase 3-like ( <i>S. cerevisiae</i> )                                                       | L1 |
| 1450698_at   | DUSP2         | dual specificity phosphatase 2                                                                                | L1 |
| 1428834_at   | DUSP4         | dual specificity phosphatase 4                                                                                | L1 |
| 1450978_at   | DVL1          | dishevelled, dsh homolog 1 ( <i>Drosophila</i> )                                                              | L1 |
| 1434723_at   | E130307A14Rik | RIKEN cDNA E130307A14 gene                                                                                    |    |
| 1417444_at   | E2F5          | E2F transcription factor 5, p130-binding                                                                      | L1 |
| 1433555_at   | EAF1          | ELL associated factor 1                                                                                       | L1 |
| 1416302_at   | EBF1          | early B-cell factor 1                                                                                         | L1 |
| 1455741_a_at | ECE1          | endothelin converting enzyme 1                                                                                | L1 |
| 1419638_at   | EFNB2         | ephrin-B2                                                                                                     | L1 |
| 1416131_s_at | EFR3A         | EFR3 homolog A ( <i>S. cerevisiae</i> )                                                                       | L1 |
| 1416557_a_at | EFTUD2        | elongation factor Tu GTP binding domain containing 2                                                          | L1 |
| 1438835_a_at | EFTUD2        | elongation factor Tu GTP binding domain containing 2                                                          | L1 |
| 1434647_at   | EGFLAM        | EGF-like, fibronectin type III and laminin G domains                                                          | L1 |
| 1418649_at   | EGLN3         | egl nine homolog 3 ( <i>C. elegans</i> )                                                                      |    |
| 1449852_a_at | EHD4          | EH-domain containing 4                                                                                        | L1 |
| 1460692_at   | EHMT2         | euchromatic histone-lysine N-methyltransferase 2                                                              | L1 |
| 1429350_at   | EID3          | EP300 interacting inhibitor of differentiation 3                                                              | L1 |
| 1422005_at   | EIF2AK2       | eukaryotic translation initiation factor 2-alpha kinase 2                                                     |    |
| 1441063_at   | EIF2C3        | eukaryotic translation initiation factor 2C, 3                                                                |    |

|              |          |                                                               |    |
|--------------|----------|---------------------------------------------------------------|----|
| 1455575_at   | EIF4EBP2 | eukaryotic translation initiation factor 4E binding protein 2 | L1 |
| 1426833_at   | EIF4G3   | eukaryotic translation initiation factor 4 gamma, 3           | L1 |
| 1451521_x_at | EIF4H    | eukaryotic translation initiation factor 4H                   | L1 |
| 1434605_at   | EIF5B    | eukaryotic translation initiation factor 5B                   |    |
| 1428045_a_at | ELF2     | E74-like factor 2 (ets domain transcription factor)           |    |
| 1456098_a_at | ELMO2    | engulfment and cell motility 2                                | L1 |
| 1434489_at   | ELMO3    | engulfment and cell motility 3                                |    |
| 1415774_at   | ELP2     | elongator acetyltransferase complex subunit 2                 | L1 |
| 1448882_at   | EMC6     | ER membrane protein complex subunit 6                         | L1 |
| 1435264_at   | EMILIN2  | elastin microfibril interfacier 2                             | L1 |
| 1423705_at   | ENOPH1   | enolase-phosphatase 1                                         | L1 |
| 1441630_at   | EP400    | E1A binding protein p400                                      |    |
| 1426860_at   | EP400    | E1A binding protein p400                                      | L1 |
| 1447349_s_at | EP400    | E1A binding protein p400                                      | L1 |
| 1459619_at   | EPB41L2  | erythrocyte membrane protein band 4.1-like 2                  | L1 |
| 1419062_at   | EPB41L3  | erythrocyte membrane protein band 4.1-like 3                  |    |
| 1421815_at   | EPDR1    | ependymin related protein 1 (zebrafish)                       | L1 |
| 1428419_at   | EPG5     | ectopic P-granules autophagy protein 5 homolog (C. elegans)   |    |
| 1421151_a_at | EPHA2    | EPH receptor A2                                               |    |
| 1452158_at   | EPRS     | glutamyl-prolyl-tRNA synthetase                               | L1 |
| 1441604_at   | ESD      | esterase D                                                    | L1 |
| 1451142_at   | EXOC1    | exocyst complex component 1                                   | L1 |
| 1422684_a_at | EXOC4    | exocyst complex component 4                                   |    |
| 1460679_at   | EXOSC4   | exosome component 4                                           | L1 |
| 1418290_a_at | EZH1     | enhancer of zeste homolog 1 (Drosophila)                      |    |
| 1437308_s_at | F2R      | coagulation factor II (thrombin) receptor                     | L1 |
| 1426893_at   | FAM102A  | family with sequence similarity 102, member A                 | L1 |



|              |               |                                                                             |    |
|--------------|---------------|-----------------------------------------------------------------------------|----|
| 1436229_at   | FAM126B       | family with sequence similarity 126, member B                               | L1 |
| 1455793_at   | FAM149A       | family with sequence similarity 149, member A                               | L1 |
| 1434269_at   | FAM149B1      | family with sequence similarity 149, member B1                              | L1 |
| 1435686_at   | FAM149B1      | family with sequence similarity 149, member B1                              | L1 |
| 1453284_at   | FAM151B       | family with sequence similarity 151, member B                               | L1 |
| 1417402_at   | Fam165b       | family with sequence similarity 165, member B                               | L1 |
| 1419170_at   | FAM174A       | family with sequence similarity 174, member A                               | L1 |
| 1417688_at   | FAM20C        | family with sequence similarity 20, member C                                |    |
| 1436150_at   | FAM219A       | family with sequence similarity 219, member A                               |    |
| 1433588_at   | FAM21A/FAM21C | family with sequence similarity 21, member C                                | L1 |
| 1454644_at   | FAM40A        | family with sequence similarity 40, member A                                | L1 |
| 1443747_at   | FAM48A        | family with sequence similarity 48, member A                                | L1 |
| 1428874_at   | FAM96B        | family with sequence similarity 96, member B                                | L1 |
| 1452280_at   | FARP1         | FERM, RhoGEF (ARHGEF) and pleckstrin domain protein 1 (chondrocyte-derived) | L1 |
| 1460251_at   | FAS           | Fas (TNF receptor superfamily, member 6)                                    | L1 |
| 1460635_at   | FASTK         | Fas-activated serine/threonine kinase                                       | L1 |
| 1459749_s_at | FAT4          | FAT tumor suppressor homolog 4 (Drosophila)                                 |    |
| 1452860_at   | FBXL17        | F-box and leucine-rich repeat protein 17                                    | L1 |
| 1418419_at   | FBXL20        | F-box and leucine-rich repeat protein 20                                    | L1 |
| 1448747_at   | FBXO32        | F-box protein 32                                                            |    |
| 1427121_at   | FBXO4         | F-box protein 4                                                             | L1 |
| 1418323_at   | FEM1B         | fem-1 homolog b (C. elegans)                                                | L1 |

|              |         |                                                                                                  |    |
|--------------|---------|--------------------------------------------------------------------------------------------------|----|
| 1455337_at   | FGD4    | FYVE, RhoGEF and PH domain containing 4                                                          |    |
| 1439959_at   | FGF11   | fibroblast growth factor 11                                                                      |    |
| 1424050_s_at | FGFR1   | fibroblast growth factor receptor 1                                                              |    |
| 1451912_a_at | FGFRL1  | fibroblast growth factor receptor-like 1                                                         | L1 |
| 1416044_at   | FLII    | flightless I homolog (Drosophila)                                                                | L1 |
| 1448189_a_at | FLII    | flightless I homolog (Drosophila)                                                                | L1 |
| 1442107_at   | FLNB    | filamin B, beta                                                                                  |    |
| 1417544_a_at | FLOT2   | flotillin 2                                                                                      | L1 |
| 1434414_at   | FOXRED2 | FAD-dependent oxidoreductase domain containing 2                                                 |    |
| 1423681_at   | FTSJD2  | FtsJ methyltransferase domain containing 2                                                       | L1 |
| 1437544_at   | FUBP1   | far upstream element (FUSE) binding protein 1                                                    |    |
| 1419761_a_at | GABPB1  | GA binding protein transcription factor, beta subunit 1                                          |    |
| 1440868_at   | GABPB2  | GA binding protein transcription factor, beta subunit 2                                          |    |
| 1418194_at   | GALNT10 | UDP-N-acetyl-alpha-D-galactosamine:polypeptide N-acetylgalactosaminyltransferase 10 (GalNAc-T10) | L1 |
| 1422558_at   | GAMT    | guanidinoacetate N-methyltransferase                                                             |    |
| 1415787_at   | GANAB   | glucosidase, alpha; neutral AB                                                                   | L1 |
| 1436385_at   | GANC    | glucosidase, alpha; neutral C                                                                    | L1 |
| 1425599_a_at | GATAD1  | GATA zinc finger domain containing 1                                                             | L1 |
| 1423992_at   | GATAD2A | GATA zinc finger domain containing 2A                                                            | L1 |
| 1419484_a_at | GBAS    | glioblastoma amplified sequence                                                                  |    |
| 1420654_a_at | GBE1    | glucan (1,4-alpha-), branching enzyme 1                                                          | L1 |
| 1418627_at   | GCLM    | glutamate-cysteine ligase, modifier subunit                                                      | L1 |
| 1439050_at   | GCLM    | glutamate-cysteine ligase, modifier subunit                                                      | L1 |
| 1455180_at   | GCOM1   | GRINL1A complex locus 1                                                                          | L1 |

|              |               |                                                                              |    |
|--------------|---------------|------------------------------------------------------------------------------|----|
| 1423554_at   | GGCX          | gamma-glutamyl carboxylase                                                   | L1 |
| 1419595_a_at | GGH           | gamma-glutamyl hydrolase<br>(conjugase, folylpolygammaglutamyl<br>hydrolase) | L1 |
| 1419502_at   | GHDC          | GH3 domain containing                                                        | L1 |
| 1428713_s_at | GIN52         | GIN5 complex subunit 2 (Psf2<br>homolog)                                     |    |
| 1447787_x_at | GJC1          | gap junction protein, gamma 1, 45kDa                                         | L1 |
| 1430385_a_at | GLB1L         | galactosidase, beta 1-like                                                   | L1 |
| 1433728_at   | GLB1L2        | galactosidase, beta 1-like 2                                                 |    |
| 1451972_at   | GLCCI1        | glucocorticoid induced transcript 1                                          | L1 |
| 1452033_at   | GLE1          | GLE1 RNA export mediator homolog<br>(yeast)                                  | L1 |
| 1428270_at   | GLT8D1        | glycosyltransferase 8 domain<br>containing 1                                 | L1 |
| 1419443_at   | Gm10094/Sap18 | Sin3-associated polypeptide 18                                               | L1 |
| 1436265_at   | Gm10419       | predicted gene 10419                                                         | L1 |
| 1430285_at   | Gm14057       | Ppp1r14c pseudogene                                                          |    |
| 1456547_at   | Gm19313       | predicted gene, 19313                                                        | L1 |
| 1441233_at   | Gm19858       | predicted gene, 19858                                                        | L1 |
| 1420304_x_at | Gm19974       | predicted gene, 19974                                                        | L1 |
| 1460021_at   | Gm6658        | predicted gene 6658                                                          |    |
| 1446470_at   | Gm9799        | predicted gene 9799                                                          | L1 |
| 1447246_at   | Gm9873        | predicted gene 9873                                                          | L1 |
| 1417069_a_at | GMFB          | glia maturation factor, beta                                                 |    |
| 1434254_at   | GNA11         | guanine nucleotide binding protein (G<br>protein), alpha 11 (Gq class)       | L1 |
| 1426579_at   | GNL2          | guanine nucleotide binding protein-<br>like 2 (nucleolar)                    | L1 |
| 1437566_at   | GNL2          | guanine nucleotide binding protein-<br>like 2 (nucleolar)                    | L1 |
| 1423157_at   | GNPNAT1       | glucosamine-phosphate N-<br>acetyltransferase 1                              | L1 |
| 1436526_at   | GNPTG         | N-acetylglucosamine-1-phosphate<br>transferase, gamma subunit                | L1 |
| 1424385_at   | GON4L         | gon-4-like (C. elegans)                                                      | L1 |
| 1458365_at   | GORAB         | golgin, RAB6-interacting                                                     | L1 |

|              |         |                                                                             |    |
|--------------|---------|-----------------------------------------------------------------------------|----|
| 1451671_at   | GORASP1 | golgi reassembly stacking protein 1, 65kDa                                  | L1 |
| 1450970_at   | GOT1    | glutamic-oxaloacetic transaminase 1, soluble (aspartate aminotransferase 1) | L1 |
| 1437417_s_at | GPC6    | glypican 6                                                                  | L1 |
| 1434344_at   | GPKOW   | G patch domain and KOW motifs                                               | L1 |
| 1418379_s_at | GPR124  | G protein-coupled receptor 124                                              | L1 |
| 1417245_at   | GPR180  | G protein-coupled receptor 180                                              | L1 |
| 1415699_a_at | GPS1    | G protein pathway suppressor 1                                              | L1 |
| 1441894_s_at | GRASP   | GRP1 (general receptor for phosphoinositides 1)-associated scaffold protein |    |
| 1424030_at   | GRHL1   | grainyhead-like 1 (Drosophila)                                              |    |
| 1427046_at   | GRHL2   | grainyhead-like 2 (Drosophila)                                              | L1 |
| 1420563_at   | GRIA3   | glutamate receptor, ionotropic, AMPA 3                                      |    |
| 1451672_at   | GRK6    | G protein-coupled receptor kinase 6                                         | L1 |
| 1433457_s_at | GRSF1   | G-rich RNA sequence binding factor 1                                        | L1 |
| 1439931_at   | GSK3B   | glycogen synthase kinase 3 beta                                             |    |
| 1434568_at   | GTF3C6  | general transcription factor IIIc, polypeptide 6, alpha 35kDa               | L1 |
| 1416690_at   | GTPBP2  | GTP binding protein 2                                                       | L1 |
| 1423878_at   | GYPC    | glycophorin C (Gerbich blood group)                                         | L1 |
| 1424771_at   | H2AFJ   | H2A histone family, member J                                                | L1 |
| 1451229_at   | HDAC11  | histone deacetylase 11                                                      | L1 |
| 1448928_at   | HDAC6   | histone deacetylase 6                                                       | L1 |
| 1449615_s_at | HDLBP   | high density lipoprotein binding protein                                    | L1 |
| 1435013_at   | HEATR2  | HEAT repeat containing 2                                                    | L1 |
| 1437970_at   | HEATR2  | HEAT repeat containing 2                                                    | L1 |
| 1424141_at   | HECTD1  | HECT domain containing E3 ubiquitin protein ligase 1                        | L1 |
| 1433524_at   | HECTD4  | HECT domain containing E3 ubiquitin protein ligase 4                        |    |
| 1434060_at   | HERC1   | HECT and RLD domain containing E3 ubiquitin protein ligase family member 1  | L1 |

|              |                           |                                                                            |    |
|--------------|---------------------------|----------------------------------------------------------------------------|----|
| 1444228_s_at | HERC2                     | HECT and RLD domain containing E3 ubiquitin protein ligase 2               |    |
| 1434844_at   | HEXDC                     | hexosaminidase (glycosyl hydrolase family 20, catalytic domain) containing |    |
| 1448359_a_at | Higd1a                    | HIG1 domain family, member 1A                                              | L1 |
| 1448512_at   | HILS1                     | histone linker H1 domain, spermatid-specific 1, pseudogene                 | L1 |
| 1434557_at   | HIP1                      | huntingtin interacting protein 1                                           | L1 |
| 1429566_a_at | HIPK2                     | homeodomain interacting protein kinase 2                                   | L1 |
| 1456022_at   | HIPK2                     | homeodomain interacting protein kinase 2                                   | L1 |
| 1419191_at   | HIPK3                     | homeodomain interacting protein kinase 3                                   | L1 |
| 1422948_s_at | Hist2h4 (includes others) | histone cluster 2, H4                                                      | L1 |
| 1458802_at   | HIVEP3                    | human immunodeficiency virus type I enhancer binding protein 3             |    |
| 1417637_a_at | HMG20B                    | high mobility group 20B                                                    | L1 |
| 1448239_at   | HMOX1                     | heme oxygenase (decycling) 1                                               | L1 |
| 1452030_a_at | HNRNPR                    | heterogeneous nuclear ribonucleoprotein R                                  | L1 |
| 1419350_at   | HOOK2                     | hook homolog 2 (Drosophila)                                                |    |
| 1439196_at   | HOOK3                     | hook homolog 3 (Drosophila)                                                | L1 |
| 1427362_x_at | HOXC6                     | homeobox C6                                                                | L1 |
| 1450647_at   | HPS3                      | Hermansky-Pudlak syndrome 3                                                |    |
| 1434677_at   | HPS5                      | Hermansky-Pudlak syndrome 5                                                | L1 |
| 1449038_at   | HSD11B1                   | hydroxysteroid (11-beta) dehydrogenase 1                                   |    |
| 1424622_at   | HSF1                      | heat shock transcription factor 1                                          | L1 |
| 1434051_s_at | HSPA12A                   | heat shock 70kDa protein 12A                                               | L1 |
| 1458385_at   | HSPA4L                    | heat shock 70kDa protein 4-like                                            |    |
| 1447824_x_at | HSPA5                     | heat shock 70kDa protein 5 (glucose-regulated protein, 78kDa)              | L1 |
| 1427029_at   | HTRA3                     | HtrA serine peptidase 3                                                    | L1 |
| 1415703_at   | HUWE1                     | HECT, UBA and WWE domain containing 1, E3 ubiquitin protein ligase         | L1 |

|              |         |                                                                                           |    |
|--------------|---------|-------------------------------------------------------------------------------------------|----|
| 1443183_at   | HUWE1   | HECT, UBA and WWE domain containing 1, E3 ubiquitin protein ligase                        | L1 |
| 1452154_at   | IARS    | isoleucyl-tRNA synthetase                                                                 | L1 |
| 1423259_at   | ID4     | inhibitor of DNA binding 4, dominant negative helix-loop-helix protein                    |    |
| 1441271_at   | IDH3B   | isocitrate dehydrogenase 3 (NAD+) beta                                                    | L1 |
| 1454628_at   | IFFO1   | intermediate filament family orphan 1                                                     | L1 |
| 1451462_a_at | IFNAR2  | interferon (alpha, beta and omega) receptor 2                                             | L1 |
| 1424648_at   | IFT27   | intraflagellar transport 27 homolog (Chlamydomonas)                                       | L1 |
| 1434299_x_at | IFT27   | intraflagellar transport 27 homolog (Chlamydomonas)                                       | L1 |
| 1439764_s_at | IGF2BP2 | insulin-like growth factor 2 mRNA binding protein 2                                       |    |
| 1440979_at   | IGF2R   | insulin-like growth factor 2 receptor                                                     | L1 |
| 1422826_at   | IGFALS  | insulin-like growth factor binding protein, acid labile subunit                           | L1 |
| 1458268_s_at | IGFBP3  | insulin-like growth factor binding protein 3                                              | L1 |
| 1437804_at   | IGFBP7  | insulin-like growth factor binding protein 7                                              |    |
| 1423584_at   | IGFBP7  | insulin-like growth factor binding protein 7                                              | L1 |
| 1425763_x_at | IGHA1   | immunoglobulin heavy constant alpha 1                                                     |    |
| 1427329_a_at | IGHM    | immunoglobulin heavy constant mu                                                          | L1 |
| 1427351_s_at | IGHM    | immunoglobulin heavy constant mu                                                          | L1 |
| 1424305_at   | IGJ     | immunoglobulin J polypeptide, linker protein for immunoglobulin alpha and mu polypeptides |    |
| 1452557_a_at | Igk     | immunoglobulin kappa chain complex                                                        |    |

|              |        |                                                                      |    |
|--------------|--------|----------------------------------------------------------------------|----|
| 1429065_at   | IKBIP  | IKBKB interacting protein                                            | L1 |
| 1418219_at   | IL15   | interleukin 15                                                       | L1 |
| 1448681_at   | IL15RA | interleukin 15 receptor, alpha                                       |    |
| 1435714_x_at | IL17D  | interleukin 17D                                                      | L1 |
| 1420904_at   | IL17RA | interleukin 17 receptor A                                            | L1 |
| 1420905_at   | IL17RA | interleukin 17 receptor A                                            | L1 |
| 1449942_a_at | ILK    | integrin-linked kinase                                               | L1 |
| 1454658_at   | ILVBL  | ilvB (bacterial acetolactate synthase)-like                          | L1 |
| 1423229_at   | INPP5E | inositol polyphosphate-5-phosphatase, 72 kDa                         | L1 |
| 1442100_at   | INPP5F | inositol polyphosphate-5-phosphatase F                               | L1 |
| 1460394_a_at | INPPL1 | inositol polyphosphate phosphatase-like 1                            | L1 |
| 1426943_at   | INTS1  | integrator complex subunit 1                                         | L1 |
| 1448668_a_at | IRAK1  | interleukin-1 receptor-associated kinase 1                           | L1 |
| 1435040_at   | IRAK3  | interleukin-1 receptor-associated kinase 3                           | L1 |
| 1430316_at   | ISPD   | isoprenoid synthase domain containing                                |    |
| 1423837_at   | IST1   | increased sodium tolerance 1 homolog (yeast)                         | L1 |
| 1423838_s_at | IST1   | increased sodium tolerance 1 homolog (yeast)                         | L1 |
| 1415977_at   | ISYNA1 | inositol-3-phosphate synthase 1                                      | L1 |
| 1456498_at   | ITGA4  | integrin, alpha 4 (antigen CD49D, alpha 4 subunit of VLA-4 receptor) |    |
| 1450029_s_at | ITGA9  | integrin, alpha 9                                                    | L1 |
| 1417279_at   | ITPR1  | inositol 1,4,5-trisphosphate receptor, type 1                        | L1 |
| 1427287_s_at | ITPR2  | inositol 1,4,5-trisphosphate receptor, type 2                        | L1 |
| 1425899_a_at | ITSN1  | intersectin 1 (SH3 domain protein)                                   | L1 |
| 1433805_at   | JAK1   | Janus kinase 1                                                       | L1 |
| 1460577_at   | JMY    | junction mediating and regulatory protein, p53 cofactor              | L1 |
| 1433742_at   | KANK1  | KN motif and ankyrin repeat domains 1                                | L1 |

|              |          |                                                                   |    |
|--------------|----------|-------------------------------------------------------------------|----|
| 1438400_at   | KANSL3   | KAT8 regulatory NSL complex subunit 3                             | L1 |
| 1433433_at   | KAT7     | K(lysine) acetyltransferase 7                                     | L1 |
| 1423179_at   | KCNB1    | potassium voltage-gated channel, Shab-related subfamily, member 1 | L1 |
| 1418142_at   | KCNJ8    | potassium inwardly-rectifying channel, subfamily J, member 8      | L1 |
| 1449158_at   | KCNK2    | potassium channel, subfamily K, member 2                          |    |
| 1425341_at   | KCNK3    | potassium channel, subfamily K, member 3                          | L1 |
| 1440355_at   | Kctd12b  | potassium channel tetramerisation domain containing 12b           | L1 |
| 1435525_at   | KCTD17   | potassium channel tetramerisation domain containing 17            | L1 |
| 1448302_at   | KCTD20   | potassium channel tetramerisation domain containing 20            | L1 |
| 1436811_at   | KCTD3    | potassium channel tetramerisation domain containing 3             | L1 |
| 1439691_at   | KIAA0232 | KIAA0232                                                          |    |
| 1454721_at   | KIAA0317 | KIAA0317                                                          | L1 |
| 1427978_at   | KIAA0494 | KIAA0494                                                          | L1 |
| 1427319_at   | KIAA1033 | KIAA1033                                                          |    |
| 1457678_at   | KIAA1468 | KIAA1468                                                          |    |
| 1424913_at   | KIAA1737 | KIAA1737                                                          | L1 |
| 1447853_x_at | KIF13A   | kinesin family member 13A                                         |    |
| 1423995_at   | KIF1B    | kinesin family member 1B                                          | L1 |
| 1417395_at   | KLF4     | Kruppel-like factor 4 (gut)                                       | L1 |
| 1418280_at   | KLF6     | Kruppel-like factor 6                                             |    |
| 1460678_at   | KLHDC2   | kelch domain containing 2                                         | L1 |
| 1455910_at   | KLHDC3   | kelch domain containing 3                                         |    |
| 1428081_at   | KLHL21   | kelch-like 21 (Drosophila)                                        | L1 |
| 1426481_at   | KLHL22   | kelch-like 22 (Drosophila)                                        | L1 |
| 1417975_at   | KPNA4    | karyopherin alpha 4 (importin alpha 3)                            |    |
| 1416925_at   | KPNB1    | karyopherin (importin) beta 1                                     | L1 |



|              |              |                                                                 |    |
|--------------|--------------|-----------------------------------------------------------------|----|
| 1435472_at   | KREMEN1      | kringle containing transmembrane protein 1                      | L1 |
| 1428084_at   | KRR1         | KRR1, small subunit (SSU) processome component, homolog (yeast) | L1 |
| 1427352_at   | KRT79        | keratin 79                                                      |    |
| 1460185_at   | KRT85        | keratin 85                                                      | L1 |
| 1416106_at   | KTI12        | KTI12 homolog, chromatin associated (S. cerevisiae)             | L1 |
| 1427073_at   | LACE1        | lactation elevated 1                                            | L1 |
| 1424808_at   | LAMA4        | laminin, alpha 4                                                |    |
| 1416513_at   | LAMB2        | laminin, beta 2 (laminin 5)                                     | L1 |
| 1448718_at   | LAMTOR1      | late endosomal/lysosomal adaptor, MAPK and MTOR activator 1     |    |
| 1428310_at   | LARP7        | La ribonucleoprotein domain family, member 7                    | L1 |
| 1456309_x_at | LASP1        | LIM and SH3 protein 1                                           |    |
| 1460173_at   | LASP1        | LIM and SH3 protein 1                                           |    |
| 1417044_at   | LCMT1        | leucine carboxyl methyltransferase 1                            | L1 |
| 1452752_at   | LEPRE1       | leucine proline-enriched proteoglycan (leprecan) 1              |    |
| 1421217_a_at | LGALS9       | lectin, galactoside-binding, soluble, 9                         | L1 |
| 1448883_at   | LGMN         | legumain                                                        | L1 |
| 1425094_a_at | LHX6         | LIM homeobox 6                                                  | L1 |
| 1421207_at   | LIF          | leukemia inhibitory factor                                      | L1 |
| 1425107_a_at | LIFR         | leukemia inhibitory factor receptor alpha                       | L1 |
| 1435727_s_at | LIMA1        | LIM domain and actin binding 1                                  |    |
| 1450629_at   | LIMA1        | LIM domain and actin binding 1                                  |    |
| 1422499_at   | LIMA1        | LIM domain and actin binding 1                                  | L1 |
| 1416869_x_at | LIME1        | Lck interacting transmembrane adaptor 1                         | L1 |
| 1448500_a_at | LIME1        | Lck interacting transmembrane adaptor 1                         | L1 |
| 1448531_at   | LMNB2        | lamin B2                                                        | L1 |
| 1420981_a_at | LMO4         | LIM domain only 4                                               | L1 |
| 1438432_at   | LNPEP        | leucyl/cystinyl aminopeptidase                                  |    |
| 1446154_at   | LOC100047123 | uncharacterized LOC100047123                                    | L1 |
| 1455465_at   | LOC100505262 | uncharacterized LOC100505262                                    |    |

|              |              |                                                                             |    |
|--------------|--------------|-----------------------------------------------------------------------------|----|
| 1427820_at   | LOC100861696 | uncharacterized LOC100861696                                                |    |
| 1447975_a_at | LOC545261    | uncharacterized LOC545261                                                   | L1 |
| 1442430_at   | LOC646498    | uncharacterized LOC646498                                                   | L1 |
| 1460178_at   | LONP2        | lon peptidase 2, peroxisomal                                                | L1 |
| 1448606_at   | LPAR1        | lysophosphatidic acid receptor 1                                            |    |
| 1431056_a_at | LPL          | lipoprotein lipase                                                          | L1 |
| 1454756_at   | LRCH3        | leucine-rich repeats and calponin homology (CH) domain containing 3         | L1 |
| 1416836_at   | LRP10        | low density lipoprotein receptor-related protein 10                         | L1 |
| 1433536_at   | LRP11        | low density lipoprotein receptor-related protein 11                         | L1 |
| 1451022_at   | LRP6         | low density lipoprotein receptor-related protein 6                          |    |
| 1424353_at   | LRPPRC       | leucine-rich pentatricopeptide repeat containing                            | L1 |
| 1435648_at   | LRRN4        | leucine rich repeat neuronal 4                                              | L1 |
| 1429176_at   | LRSAM1       | leucine rich repeat and sterile alpha motif containing 1                    | L1 |
| 1425548_a_at | Lst1         | leukocyte specific transcript 1                                             | L1 |
| 1426813_at   | LTV1         | LTV1 homolog ( <i>S. cerevisiae</i> )                                       | L1 |
| 1452708_a_at | LUC7L        | LUC7-like ( <i>S. cerevisiae</i> )                                          |    |
| 1427087_at   | LUC7L2       | LUC7-like 2 ( <i>S. cerevisiae</i> )                                        |    |
| 1428384_at   | LURAP1L      | leucine rich adaptor protein 1-like                                         | L1 |
| 1423547_at   | Lyz1/Lyz2    | lysozyme 2                                                                  | L1 |
| 1450927_at   | LZTR1        | leucine-zipper-like transcription regulator 1                               | L1 |
| 1423031_at   | MAEA         | macrophage erythroblast attacher                                            | L1 |
| 1451716_at   | MAFB         | v-maf musculoaponeurotic fibrosarcoma oncogene homolog B (avian)            | L1 |
| 1426306_a_at | MAGED2       | melanoma antigen family D, 2                                                | L1 |
| 1422431_at   | MAGEE1       | melanoma antigen family E, 1                                                | L1 |
| 1454855_at   | MAGI2        | membrane associated guanylate kinase, WW and PDZ domain containing 2        | L1 |
| 1418188_a_at | MALAT1       | metastasis associated lung adenocarcinoma transcript 1 (non-protein coding) |    |

|              |          |                                                                             |    |
|--------------|----------|-----------------------------------------------------------------------------|----|
| 1418189_s_at | MALAT1   | metastasis associated lung adenocarcinoma transcript 1 (non-protein coding) |    |
| 1452378_at   | MALAT1   | metastasis associated lung adenocarcinoma transcript 1 (non-protein coding) |    |
| 1438403_s_at | MALAT1   | metastasis associated lung adenocarcinoma transcript 1 (non-protein coding) | L1 |
| 1417110_at   | MAN1A1   | mannosidase, alpha, class 1A, member 1                                      |    |
| 1417111_at   | MAN1A1   | mannosidase, alpha, class 1A, member 1                                      | L1 |
| 1456534_at   | MAN1A2   | mannosidase, alpha, class 1A, member 2                                      |    |
| 1428024_at   | MAP1LC3B | microtubule-associated protein 1 light chain 3 beta                         | L1 |
| 1451714_a_at | MAP2K3   | mitogen-activated protein kinase kinase 3                                   | L1 |
| 1425512_at   | MAP2K7   | mitogen-activated protein kinase kinase 7                                   | L1 |
| 1439467_at   | MAP4     | microtubule-associated protein 4                                            |    |
| 1422615_at   | MAP4K4   | mitogen-activated protein kinase kinase kinase 4                            | L1 |
| 1422550_a_at | MAP6     | microtubule-associated protein 6                                            |    |
| 1457316_at   | MAP6     | microtubule-associated protein 6                                            |    |
| 1425679_a_at | MAPK8IP1 | mitogen-activated protein kinase 8 interacting protein 1                    |    |
| 1425975_a_at | MAPK8IP3 | mitogen-activated protein kinase 8 interacting protein 3                    | L1 |
| 1426648_at   | MAPKAPK2 | mitogen-activated protein kinase-activated protein kinase 2                 | L1 |
| 1437494_at   | MAPKAPK3 | mitogen-activated protein kinase-activated protein kinase 3                 | L1 |
| 1417016_at   | MAPKAPK5 | mitogen-activated protein kinase-activated protein kinase 5                 | L1 |
| 1422765_at   | MAPRE1   | microtubule-associated protein, RP/EB family, member 1                      |    |

|              |         |                                                                             |    |
|--------------|---------|-----------------------------------------------------------------------------|----|
| 1428820_at   | MAPRE1  | microtubule-associated protein, RP/EB family, member 1                      |    |
| 1442553_at   | MAPRE2  | microtubule-associated protein, RP/EB family, member 2                      | L1 |
| 1419442_at   | MATN2   | matrilin 2                                                                  | L1 |
| 1440299_at   | MB21D1  | Mab-21 domain containing 1                                                  |    |
| 1441388_at   | MBD2    | methyl-CpG binding domain protein 2                                         | L1 |
| 1437704_at   | MBLAC2  | metallo-beta-lactamase domain containing 2                                  | L1 |
| 1457924_at   | MBNL1   | muscleblind-like splicing regulator 1                                       | L1 |
| 1448711_at   | MCM3AP  | minichromosome maintenance complex component 3 associated protein           | L1 |
| 1455117_at   | MCM9    | minichromosome maintenance complex component 9                              | L1 |
| 1424348_at   | MCMBP   | minichromosome maintenance complex binding protein                          | L1 |
| 1416671_a_at | MCOLN1  | mucolipin 1                                                                 | L1 |
| 1416535_at   | MCRS1   | microspherule protein 1                                                     | L1 |
| 1451058_at   | Mcts2   | malignant T cell amplified sequence 2                                       | L1 |
| 1458223_at   | MDM4    | Mdm4 p53 binding protein homolog (mouse)                                    | L1 |
| 1426572_at   | ME2     | malic enzyme 2, NAD(+)-dependent, mitochondrial                             | L1 |
| 1425585_at   | MED12   | mediator complex subunit 12                                                 | L1 |
| 1436904_at   | MED13   | mediator complex subunit 13                                                 |    |
| 1448435_at   | MED15   | mediator complex subunit 15                                                 | L1 |
| 1425473_at   | MED17   | mediator complex subunit 17                                                 | L1 |
| 1417129_a_at | MEIS2   | Meis homeobox 2                                                             | L1 |
| 1428582_at   | METTL10 | methyltransferase like 10                                                   | L1 |
| 1452950_at   | METTL15 | methyltransferase like 15                                                   | L1 |
| 1434749_at   | METTL25 | methyltransferase like 25                                                   |    |
| 1417710_at   | METTL9  | methyltransferase like 9                                                    | L1 |
| 1451572_a_at | MFF     | mitochondrial fission factor                                                | L1 |
| 1452335_at   | MFSD8   | major facilitator superfamily domain containing 8                           | L1 |
| 1452037_at   | MGAT2   | mannosyl (alpha-1,6-)-glycoprotein beta-1,2-N-acetylglucosaminyltransferase | L1 |

|              |         |                                                                                        |    |
|--------------|---------|----------------------------------------------------------------------------------------|----|
| 1431331_at   | MGLL    | monoglyceride lipase                                                                   |    |
| 1454645_at   | MGRN1   | mahogunin ring finger 1, E3 ubiquitin protein ligase                                   | L1 |
| 1459984_at   | MIA3    | melanoma inhibitory activity family, member 3                                          |    |
| 1438726_at   | MICAL2  | microtubule associated monooxygenase, calponin and LIM domain containing 2             | L1 |
| 1452916_at   | MLL4    | myeloid/lymphoid or mixed-lineage leukemia 4                                           | L1 |
| 1441456_at   | MMP24   | matrix metalloproteinase 24 (membrane-inserted)                                        | L1 |
| 1448291_at   | MMP9    | matrix metalloproteinase 9 (gelatinase B, 92kDa gelatinase, 92kDa type IV collagenase) | L1 |
| 1455099_at   | MOGAT2  | monoacylglycerol O-acyltransferase 2                                                   |    |
| 1449476_at   | MOK     | MOK protein kinase                                                                     |    |
| 1454158_at   | MPP7    | membrane protein, palmitoylated 7 (MAGUK p55 subfamily member 7)                       |    |
| 1451858_at   | MRGPRX3 | MAS-related GPR, member X3                                                             | L1 |
| 1450866_a_at | MRPL17  | mitochondrial ribosomal protein L17                                                    | L1 |
| 1416948_at   | MRPL23  | mitochondrial ribosomal protein L23                                                    |    |
| 1427158_at   | MRPS30  | mitochondrial ribosomal protein S30                                                    | L1 |
| 1452111_at   | MRPS35  | mitochondrial ribosomal protein S35                                                    | L1 |
| 1421230_a_at | MSI2    | musashi homolog 2 (Drosophila)                                                         | L1 |
| 1434481_at   | Msl1    | male-specific lethal 1 homolog (Drosophila)                                            | L1 |
| 1429601_x_at | MTHFD2L | methylenetetrahydrofolate dehydrogenase (NADP+ dependent) 2-like                       |    |
| 1429600_at   | MTHFD2L | methylenetetrahydrofolate dehydrogenase (NADP+ dependent) 2-like                       | L1 |
| 1419387_s_at | MUC13   | mucin 13, cell surface associated                                                      | L1 |
| 1422574_at   | MXD4    | MAX dimerization protein 4                                                             |    |
| 1434379_at   | MXD4    | MAX dimerization protein 4                                                             | L1 |

|              |         |                                                            |    |
|--------------|---------|------------------------------------------------------------|----|
| 1434274_at   | MYCBP2  | MYC binding protein 2, E3 ubiquitin protein ligase         |    |
| 1450651_at   | MYO10   | myosin X                                                   | L1 |
| 1451183_at   | MYO19   | myosin XIX                                                 | L1 |
| 1420426_at   | MYO7B   | myosin VIIIB                                               | L1 |
| 1436307_at   | MYO9A   | myosin IXA                                                 | L1 |
| 1417707_at   | N4BP2L1 | NEDD4 binding protein 2-like 1                             |    |
| 1452914_at   | N4BP2L1 | NEDD4 binding protein 2-like 1                             |    |
| 1433766_at   | NAA25   | N(alpha)-acetyltransferase 25, NatB auxiliary subunit      | L1 |
| 1415721_a_at | NAA60   | N(alpha)-acetyltransferase 60, NatF catalytic subunit      | L1 |
| 1448781_at   | NAB1    | NGFI-A binding protein 1 (EGR1 binding protein 1)          | L1 |
| 1417153_at   | NACC2   | NACC family member 2, BEN and BTB (POZ) domain containing  | L1 |
| 1429582_at   | NACC2   | NACC family member 2, BEN and BTB (POZ) domain containing  | L1 |
| 1430359_a_at | NADSYN1 | NAD synthetase 1                                           | L1 |
| 1448746_at   | NBN     | nibrin                                                     | L1 |
| 1423699_at   | NCAPH2  | non-SMC condensin II complex, subunit H2                   | L1 |
| 1444086_at   | NCKAP5  | NCK-associated protein 5                                   | L1 |
| 1418594_a_at | NCOA1   | nuclear receptor coactivator 1                             | L1 |
| 1435234_at   | NCOA2   | nuclear receptor coactivator 2                             |    |
| 1415923_at   | NDN     | necdin homolog (mouse)                                     | L1 |
| 1450976_at   | NDRG1   | N-myc downstream regulated 1                               | L1 |
| 1417664_a_at | NDRG3   | NDRG family member 3                                       | L1 |
| 1425850_a_at | NEK6    | NIMA (never in mitosis gene a)-related kinase 6            |    |
| 1438999_a_at | NFAT5   | nuclear factor of activated T-cells 5, tonicity-responsive |    |
| 1457117_at   | NFE2L2  | nuclear factor (erythroid-derived 2)-like 2                | L1 |
| 1427680_a_at | NFIB    | nuclear factor I/B                                         | L1 |
| 1423493_a_at | NFIX    | nuclear factor I/X (CCAAT-binding transcription factor)    | L1 |
| 1436363_a_at | NFIX    | nuclear factor I/X (CCAAT-binding transcription factor)    | L1 |
| 1436364_x_at | NFIX    | nuclear factor I/X (CCAAT-binding transcription factor)    | L1 |

|              |        |                                                                                          |    |
|--------------|--------|------------------------------------------------------------------------------------------|----|
| 1427705_a_at | NFKB1  | nuclear factor of kappa light polypeptide gene enhancer in B-cells 1                     |    |
| 1446718_at   | NFKBIB | nuclear factor of kappa light polypeptide gene enhancer in B-cells inhibitor, beta       | L1 |
| 1434753_at   | NFRKB  | nuclear factor related to kappaB binding protein                                         | L1 |
| 1423516_a_at | NID2   | nidogen 2 (osteonidogen)                                                                 |    |
| 1453345_at   | NIPAL1 | NIPA-like domain containing 1                                                            |    |
| 1442103_at   | NIPBL  | Nipped-B homolog (Drosophila)                                                            |    |
| 1423249_at   | NKTR   | natural killer-tumor recognition sequence                                                |    |
| 1424981_at   | NLN    | neurolysin (metallopeptidase M3 family)                                                  | L1 |
| 1425646_at   | NMRK1  | nicotinamide riboside kinase 1                                                           |    |
| 1418222_at   | NOA1   | nitric oxide associated 1                                                                | L1 |
| 1423211_at   | NOP10  | NOP10 ribonucleoprotein homolog (yeast)                                                  |    |
| 1423210_a_at | NOP10  | NOP10 ribonucleoprotein homolog (yeast)                                                  | L1 |
| 1421964_at   | NOTCH3 | notch 3                                                                                  | L1 |
| 1423086_at   | NPC1   | Niemann-Pick disease, type C1                                                            | L1 |
| 1427191_at   | NPR2   | natriuretic peptide receptor B/guanylate cyclase B (atrionatriuretic peptide receptor B) | L1 |
| 1433548_at   | NPRL3  | nitrogen permease regulator-like 3 (S. cerevisiae)                                       | L1 |
| 1426464_at   | NR1D1  | nuclear receptor subfamily 1, group D, member 1                                          |    |
| 1418605_at   | NR2C1  | nuclear receptor subfamily 2, group C, member 1                                          | L1 |
| 1420410_at   | NR5A2  | nuclear receptor subfamily 5, group A, member 2                                          |    |
| 1417985_at   | NRARP  | NOTCH-regulated ankyrin repeat protein                                                   | L1 |
| 1423864_at   | NRBP1  | nuclear receptor binding protein 1                                                       | L1 |
| 1418469_at   | NRIP1  | nuclear receptor interacting protein 1                                                   |    |

|              |         |                                                                               |    |
|--------------|---------|-------------------------------------------------------------------------------|----|
| 1449089_at   | NRIP1   | nuclear receptor interacting protein 1                                        | L1 |
| 1423132_a_at | NSA2    | NSA2 ribosome biogenesis homolog<br>( <i>S. cerevisiae</i> )                  |    |
| 1422456_at   | NSF     | N-ethylmaleimide-sensitive factor                                             | L1 |
| 1447705_at   | NSL1    | NSL1, MIND kinetochore complex<br>component, homolog ( <i>S. cerevisiae</i> ) |    |
| 1416412_at   | NSMAF   | neutral sphingomyelinase (N-SMase)<br>activation associated factor            | L1 |
| 1428213_at   | NSMCE4A | non-SMC element 4 homolog A ( <i>S.</i><br><i>cerevisiae</i> )                | L1 |
| 1418905_at   | NUBP1   | nucleotide binding protein 1                                                  | L1 |
| 1416903_at   | NUCB1   | nucleobindin 1                                                                | L1 |
| 1444952_a_at | NUCKS1  | nuclear casein kinase and cyclin-<br>dependent kinase substrate 1             | L1 |
| 1442799_x_at | NUDCD3  | NudC domain containing 3                                                      | L1 |
| 1437213_at   | NUDT21  | nudix (nucleoside diphosphate linked<br>moiety X)-type motif 21               | L1 |
| 1455966_s_at | NUDT21  | nudix (nucleoside diphosphate linked<br>moiety X)-type motif 21               | L1 |
| 1460358_s_at | NUDT22  | nudix (nucleoside diphosphate linked<br>moiety X)-type motif 22               | L1 |
| 1423787_at   | NUP133  | nucleoporin 133kDa                                                            | L1 |
| 1426447_at   | NUP35   | nucleoporin 35kDa                                                             |    |
| 1416073_a_at | NUP85   | nucleoporin 85kDa                                                             | L1 |
| 1434220_at   | Nup98   | nucleoporin 98                                                                | L1 |
| 1416452_at   | OAT     | ornithine aminotransferase                                                    | L1 |
| 1426764_at   | OAZ2    | ornithine decarboxylase antizyme 2                                            | L1 |
| 1438396_at   | OCRL    | oculocerebrorenal syndrome of Lowe                                            |    |
| 1451888_a_at | ODZ4    | odz, odd Oz/ten-m homolog 4<br>( <i>Drosophila</i> )                          |    |
| 1434530_at   | ODZ4    | odz, odd Oz/ten-m homolog 4<br>( <i>Drosophila</i> )                          | L1 |
| 1455993_at   | ODZ4    | odz, odd Oz/ten-m homolog 4<br>( <i>Drosophila</i> )                          | L1 |
| 1426562_a_at | OLFM1   | olfactomedin 1                                                                | L1 |
| 1432098_a_at | OlfR701 | olfactory receptor 701                                                        |    |



|              |         |                                                                  |    |
|--------------|---------|------------------------------------------------------------------|----|
| 1419534_at   | OLR1    | oxidized low density lipoprotein (lectin-like) receptor 1        | L1 |
| 1435679_at   | OPTN    | optineurin                                                       | L1 |
| 1418227_at   | ORC2    | origin recognition complex, subunit 2                            | L1 |
| 1453804_a_at | ORC4    | origin recognition complex, subunit 4                            | L1 |
| 1428355_at   | OSBP2   | oxysterol binding protein 2                                      | L1 |
| 1434223_at   | OSCP1   | organic solute carrier partner 1                                 |    |
| 1428557_a_at | OSGEPL1 | O-sialoglycoprotein endopeptidase-like 1                         | L1 |
| 1426000_at   | OXTR    | oxytocin receptor                                                |    |
| 1419853_a_at | P2RX7   | purinergic receptor P2X, ligand-gated ion channel, 7             | L1 |
| 1426519_at   | P4HA1   | prolyl 4-hydroxylase, alpha polypeptide I                        |    |
| 1437465_a_at | P4HB    | prolyl 4-hydroxylase, beta polypeptide                           | L1 |
| 1435372_a_at | PA2G4   | proliferation-associated 2G4, 38kDa                              | L1 |
| 1435762_at   | PACS1   | phosphofurin acidic cluster sorting protein 1                    | L1 |
| 1434255_at   | PACS2   | phosphofurin acidic cluster sorting protein 2                    | L1 |
| 1456403_at   | PAG1    | phosphoprotein associated with glycosphingolipid microdomains 1  |    |
| 1430875_a_at | PAK1IP1 | PAK1 interacting protein 1                                       |    |
| 1427228_at   | PALLD   | palladin, cytoskeletal associated protein                        |    |
| 1423967_at   | PALM    | paralemmin                                                       | L1 |
| 1435004_at   | PANK4   | pantothenate kinase 4                                            | L1 |
| 1415890_at   | PAPSS1  | 3'-phosphoadenosine 5'-phosphosulfate synthase 1                 | L1 |
| 1425422_a_at | PARN    | poly(A)-specific ribonuclease                                    | L1 |
| 1451969_s_at | PARP3   | poly (ADP-ribose) polymerase family, member 3                    | L1 |
| 1416818_at   | PARVA   | parvin, alpha                                                    | L1 |
| 1423302_a_at | PAXIP1  | PAX interacting (with transcription-activation domain) protein 1 | L1 |

|              |         |                                                                  |    |
|--------------|---------|------------------------------------------------------------------|----|
| 1423303_at   | PAXIP1  | PAX interacting (with transcription-activation domain) protein 1 | L1 |
| 1436920_at   | PCDH17  | protocadherin 17                                                 | L1 |
| 1437360_at   | PCDH19  | protocadherin 19                                                 | L1 |
| 1448933_at   | PCDHB16 | protocadherin beta 16                                            | L1 |
| 1419048_at   | PCNX    | pecanex homolog (Drosophila)                                     | L1 |
| 1434020_at   | PDAP1   | PDGFA associated protein 1                                       | L1 |
| 1423534_at   | PDCD2   | programmed cell death 2                                          | L1 |
| 1426844_a_at | PDCD2L  | programmed cell death 2-like                                     | L1 |
| 1426845_at   | PDCD2L  | programmed cell death 2-like                                     | L1 |
| 1433761_at   | PDE4DIP | phosphodiesterase 4D interacting protein                         | L1 |
| 1425279_at   | PDIK1L  | PDLIM1 interacting kinase 1 like                                 | L1 |
| 1441285_at   | PDP2    | pyruvate dehydrogenase phosphatase catalytic subunit 2           | L1 |
| 1431893_a_at | PDSS1   | prenyl (decaprenyl) diphosphate synthase, subunit 1              | L1 |
| 1452705_at   | PDXDC1  | pyridoxal-dependent decarboxylase domain containing 1            | L1 |
| 1421287_a_at | PECAM1  | platelet/endothelial cell adhesion molecule 1                    | L1 |
| 1453207_at   | PET100  | PET100 homolog (S. cerevisiae)                                   |    |
| 1456646_at   | PEX10   | peroxisomal biogenesis factor 10                                 | L1 |
| 1417442_a_at | PEX3    | peroxisomal biogenesis factor 3                                  | L1 |
| 1454044_a_at | PEX3    | peroxisomal biogenesis factor 3                                  | L1 |
| 1422091_at   | PFKFB2  | 6-phosphofructo-2-kinase/fructose-2,6-biphosphatase 2            | L1 |
| 1416432_at   | PFKFB3  | 6-phosphofructo-2-kinase/fructose-2,6-biphosphatase 3            | L1 |
| 1426554_a_at | PGAM1   | phosphoglycerate mutase 1 (brain)                                | L1 |
| 1438774_s_at | PGM2L1  | phosphoglucomutase 2-like 1                                      |    |
| 1456606_a_at | PHACTR1 | phosphatase and actin regulator 1                                | L1 |
| 1423212_at   | PHC1    | polyhomeotic homolog 1 (Drosophila)                              | L1 |
| 1452179_at   | PHF17   | PHD finger protein 17                                            | L1 |
| 1421069_at   | PHF2    | PHD finger protein 2                                             |    |

|              |         |                                                                     |    |
|--------------|---------|---------------------------------------------------------------------|----|
| 1457264_at   | PHF20L1 | PHD finger protein 20-like 1                                        |    |
| 1417837_at   | PHLDA2  | pleckstrin homology-like domain, family A, member 2                 |    |
| 1437115_at   | PHRF1   | PHD and ring finger domains 1                                       | L1 |
| 1451115_at   | PIAS3   | protein inhibitor of activated STAT, 3                              | L1 |
| 1428488_at   | PIGK    | phosphatidylinositol glycan anchor biosynthesis, class K            | L1 |
| 1433429_at   | PIGS    | phosphatidylinositol glycan anchor biosynthesis, class S            | L1 |
| 1437956_at   | PIK3R6  | phosphoinositide-3-kinase, regulatory subunit 6                     | L1 |
| 1416387_at   | PIP4K2C | phosphatidylinositol-5-phosphate 4-kinase, type II, gamma           | L1 |
| 1426449_a_at | PJA1    | praja ring finger 1, E3 ubiquitin protein ligase                    | L1 |
| 1420259_at   | PKP2    | plakophilin 2                                                       | L1 |
| 1450533_a_at | PLAGL1  | pleiomorphic adenoma gene-like 1                                    |    |
| 1448786_at   | PLBD1   | phospholipase B domain containing 1                                 | L1 |
| 1416675_s_at | PLCD1   | phospholipase C, delta 1                                            | L1 |
| 1448432_at   | PLCD1   | phospholipase C, delta 1                                            | L1 |
| 1416013_at   | PLD3    | phospholipase D family, member 3                                    | L1 |
| 1460341_at   | PLEKHB2 | pleckstrin homology domain containing, family B (evectins) member 2 | L1 |
| 1418595_at   | PLIN4   | perilipin 4                                                         | L1 |
| 1415901_at   | PLOD3   | procollagen-lysine, 2-oxoglutarate 5-dioxygenase 3                  | L1 |
| 1418912_at   | PLXDC2  | plexin domain containing 2                                          | L1 |
| 1424661_at   | PMPCA   | peptidase (mitochondrial processing) alpha                          |    |
| 1429709_at   | PMPCB   | peptidase (mitochondrial processing) beta                           | L1 |
| 1453185_at   | PNISR   | PNN-interacting serine/arginine-rich protein                        |    |
| 1429537_at   | PNISR   | PNN-interacting serine/arginine-rich protein                        | L1 |

|              |          |                                                                       |    |
|--------------|----------|-----------------------------------------------------------------------|----|
| 1423325_at   | PNN      | pinin, desmosome associated protein                                   | L1 |
| 1450735_at   | PNO1     | partner of NOB1 homolog (S. cerevisiae)                               | L1 |
| 1444288_at   | PNPT1    | polyribonucleotide nucleotidyltransferase 1                           | L1 |
| 1419265_at   | POC5     | POC5 centriolar protein homolog (Chlamydomonas)                       | L1 |
| 1416573_at   | POFUT2   | protein O-fucosyltransferase 2                                        | L1 |
| 1448384_at   | POFUT2   | protein O-fucosyltransferase 2                                        | L1 |
| 1449352_at   | POLL     | polymerase (DNA directed), lambda                                     | L1 |
| 1456066_a_at | POLR1A   | polymerase (RNA) I polypeptide A, 194kDa                              | L1 |
| 1415754_at   | POLR2F   | polymerase (RNA) II (DNA directed) polypeptide F                      |    |
| 1453256_at   | POLR3C   | polymerase (RNA) III (DNA directed) polypeptide C (62kD)              | L1 |
| 1450686_at   | PON2     | paraoxonase 2                                                         | L1 |
| 1451210_at   | PPAP2C   | phosphatidic acid phosphatase type 2C                                 | L1 |
| 1428154_s_at | PPAPDC1B | phosphatidic acid phosphatase type 2 domain containing 1B             | L1 |
| 1417801_a_at | PPFIBP2  | PTPRF interacting protein, binding protein 2 (liprin beta 2)          | L1 |
| 1416498_at   | PPIC     | peptidylprolyl isomerase C (cyclophilin C)                            | L1 |
| 1434475_at   | PPIG     | peptidylprolyl isomerase G (cyclophilin G)                            |    |
| 1460584_at   | PIP5K1   | diphosphoinositol pentakisphosphate kinase 1                          | L1 |
| 1453171_s_at | PPM1A    | protein phosphatase, Mg <sup>2+</sup> /Mn <sup>2+</sup> dependent, 1A | L1 |
| 1454934_at   | PPM1F    | protein phosphatase, Mg <sup>2+</sup> /Mn <sup>2+</sup> dependent, 1F | L1 |
| 1435699_at   | PPM1L    | protein phosphatase, Mg <sup>2+</sup> /Mn <sup>2+</sup> dependent, 1L |    |
| 1434786_at   | PPP1R12B | protein phosphatase 1, regulatory subunit 12B                         | L1 |
| 1454848_at   | PPP1R12C | protein phosphatase 1, regulatory subunit 12C                         | L1 |

|              |                 |                                                                              |    |
|--------------|-----------------|------------------------------------------------------------------------------|----|
| 1436716_at   | PPP1R14B        | protein phosphatase 1, regulatory (inhibitor) subunit 14B                    |    |
| 1436366_at   | PPP1R15B        | protein phosphatase 1, regulatory subunit 15B                                |    |
| 1426798_a_at | PPP1R15B        | protein phosphatase 1, regulatory subunit 15B                                | L1 |
| 1417341_a_at | Ppp1r2          | protein phosphatase 1, regulatory (inhibitor) subunit 2                      | L1 |
| 1442024_at   | PPP1R3E         | protein phosphatase 1, regulatory subunit 3E                                 | L1 |
| 1437730_at   | PPP2R2A         | protein phosphatase 2, regulatory subunit B, alpha                           | L1 |
| 1428463_a_at | PPP2R5E         | protein phosphatase 2, regulatory subunit B', epsilon isoform                | L1 |
| 1424115_at   | PPP5C           | protein phosphatase 5, catalytic subunit                                     | L1 |
| 1424116_x_at | PPP5C           | protein phosphatase 5, catalytic subunit                                     | L1 |
| 1451242_a_at | PPP5C           | protein phosphatase 5, catalytic subunit                                     | L1 |
| 1422468_at   | PPT1            | palmitoyl-protein thioesterase 1                                             | L1 |
| 1439160_at   | PRAMEF7/PRAMEF8 | PRAME family member 8                                                        |    |
| 1452208_at   | PRDM4           | PR domain containing 4                                                       | L1 |
| 1436962_at   | PRDM6           | PR domain containing 6                                                       |    |
| 1416167_at   | PRDX4           | peroxiredoxin 4                                                              | L1 |
| 1455667_at   | PREB            | prolactin regulatory element binding                                         | L1 |
| 1424119_at   | PRKAB1          | protein kinase, AMP-activated, beta 1 non-catalytic subunit                  | L1 |
| 1428230_at   | PRKD3           | protein kinase D3                                                            | L1 |
| 1449876_at   | PRKG1           | protein kinase, cGMP-dependent, type I                                       |    |
| 1448923_at   | PRKRA           | protein kinase, interferon-inducible double stranded RNA dependent activator | L1 |
| 1427439_s_at | PRMT5           | protein arginine methyltransferase 5                                         |    |
| 1420664_s_at | PROCR           | protein C receptor, endothelial                                              | L1 |
| 1455524_at   | PROSER1         | proline and serine rich 1                                                    | L1 |

|              |        |                                                                           |    |
|--------------|--------|---------------------------------------------------------------------------|----|
| 1460633_at   | PRPF19 | PRP19/PSO4 pre-mRNA processing factor 19 homolog ( <i>S. cerevisiae</i> ) | L1 |
| 1422453_at   | PRPF8  | PRP8 pre-mRNA processing factor 8 homolog ( <i>S. cerevisiae</i> )        | L1 |
| 1416052_at   | PRPS1  | phosphoribosyl pyrophosphate synthetase 1                                 | L1 |
| 1460349_at   | PRR14  | proline rich 14                                                           | L1 |
| 1432613_at   | PRR15  | proline rich 15                                                           | L1 |
| 1424058_at   | PRRC1  | proline-rich coiled-coil 1                                                | L1 |
| 1429433_at   | PRRC2C | proline-rich coiled-coil 2C                                               |    |
| 1431484_at   | PRRG1  | proline rich Gla (G-carboxyglutamic acid) 1                               | L1 |
| 1441707_at   | PSMA3  | proteasome (prosome, macropain) subunit, alpha type, 3                    |    |
| 1416291_at   | PSMC4  | proteasome (prosome, macropain) 26S subunit, ATPase, 4                    | L1 |
| 1423697_at   | PSMD6  | proteasome (prosome, macropain) 26S subunit, non-ATPase, 6                | L1 |
| 1415673_at   | PSPH   | phosphoserine phosphatase                                                 | L1 |
| 1428853_at   | PTCH1  | patched 1                                                                 |    |
| 1422655_at   | PTCH2  | patched 2                                                                 |    |
| 1460010_a_at | PTDSS2 | phosphatidylserine synthase 2                                             | L1 |
| 1449449_at   | PTGES  | prostaglandin E synthase                                                  | L1 |
| 1449450_at   | PTGES  | prostaglandin E synthase                                                  | L1 |
| 1417092_at   | PTH1R  | parathyroid hormone 1 receptor                                            | L1 |
| 1434653_at   | PTK2B  | PTK2B protein tyrosine kinase 2 beta                                      | L1 |
| 1418181_at   | PTP4A3 | protein tyrosine phosphatase type IVA, member 3                           | L1 |
| 1433823_at   | PTPDC1 | protein tyrosine phosphatase domain containing 1                          | L1 |
| 1427699_a_at | PTPN11 | protein tyrosine phosphatase, non-receptor type 11                        |    |
| 1417140_a_at | PTPN2  | protein tyrosine phosphatase, non-receptor type 2                         | L1 |
| 1427486_at   | PTPRB  | protein tyrosine phosphatase, receptor type, B                            | L1 |

|              |           |                                                                   |    |
|--------------|-----------|-------------------------------------------------------------------|----|
| 1420841_at   | PTPRF     | protein tyrosine phosphatase, receptor type, F                    |    |
| 1420843_at   | PTPRF     | protein tyrosine phosphatase, receptor type, F                    | L1 |
| 1434360_s_at | PTPRG     | protein tyrosine phosphatase, receptor type, G                    | L1 |
| 1423117_at   | PUM1      | pumilio homolog 1 (Drosophila)                                    | L1 |
| 1428800_a_at | PUS7L     | pseudouridylate synthase 7 homolog (S. cerevisiae)-like           |    |
| 1448673_at   | PVRL3     | poliovirus receptor-related 3                                     | L1 |
| 1451253_at   | PXK       | PX domain containing serine/threonine kinase                      | L1 |
| 1417741_at   | PYGL      | phosphorylase, glycogen, liver                                    | L1 |
| 1423712_a_at | QARS      | glutaminyl-tRNA synthetase                                        | L1 |
| 1449518_at   | QPCTL     | glutaminyl-peptide cyclotransferase-like                          | L1 |
| 1452736_at   | R3HCC1    | R3H domain and coiled-coil containing 1                           |    |
| 1438905_x_at | R3HDM4    | R3H domain containing 4                                           | L1 |
| 1438022_at   | RAB11FIP3 | RAB11 family interacting protein 3 (class II)                     | L1 |
| 1419946_s_at | RAB2A     | RAB2A, member RAS oncogene family                                 |    |
| 1433922_at   | RAB35     | RAB35, member RAS oncogene family                                 | L1 |
| 1417700_at   | RAB38     | RAB38, member RAS oncogene family                                 |    |
| 1418341_at   | RAB4A     | RAB4A, member RAS oncogene family                                 | L1 |
| 1425602_a_at | RABEP2    | rabaptin, RAB GTPase binding effector protein 2                   | L1 |
| 1456822_at   | RAD23B    | RAD23 homolog B (S. cerevisiae)                                   |    |
| 1416602_a_at | RAD52     | RAD52 homolog (S. cerevisiae)                                     | L1 |
| 1417248_at   | RALBP1    | ralA binding protein 1                                            | L1 |
| 1443877_a_at | RAPGEF6   | Rap guanine nucleotide exchange factor (GEF) 6                    | L1 |
| 1428538_s_at | RARRES2   | retinoic acid receptor responder (tazarotene induced) 2           |    |
| 1423619_at   | RASD1     | RAS, dexamethasone-induced 1                                      | L1 |
| 1438713_at   | RASSF8    | Ras association (RalGDS/AF-6) domain family (N-terminal) member 8 |    |

|              |        |                                                                                       |    |
|--------------|--------|---------------------------------------------------------------------------------------|----|
| 1426487_a_at | RBBP6  | retinoblastoma binding protein 6                                                      | L1 |
| 1416174_at   | RBBP9  | retinoblastoma binding protein 9                                                      | L1 |
| 1425166_at   | RBL1   | retinoblastoma-like 1 (p107)                                                          |    |
| 1418146_a_at | RBL2   | retinoblastoma-like 2 (p130)                                                          | L1 |
| 1425981_a_at | RBL2   | retinoblastoma-like 2 (p130)                                                          | L1 |
| 1423741_at   | RBM10  | RNA binding motif protein 10                                                          | L1 |
| 1425522_at   | RBM25  | RNA binding motif protein 25                                                          | L1 |
| 1455430_at   | RBM33  | RNA binding motif protein 33                                                          | L1 |
| 1426671_a_at | RBM39  | RNA binding motif protein 39                                                          | L1 |
| 1418703_at   | RBMS1  | RNA binding motif, single stranded interacting protein 1                              | L1 |
| 1429359_s_at | RBPMS  | RNA binding protein with multiple splicing                                            |    |
| 1444765_at   | RBPMS  | RNA binding protein with multiple splicing                                            |    |
| 1425652_s_at | RBPMS  | RNA binding protein with multiple splicing                                            | L1 |
| 1434027_at   | RCAN3  | RCAN family member 3                                                                  |    |
| 1416390_at   | RCBTB2 | regulator of chromosome condensation (RCC1) and BTB (POZ) domain containing protein 2 |    |
| 1416730_at   | RCL1   | RNA terminal phosphate cyclase-like 1                                                 | L1 |
| 1422449_s_at | RCN2   | reticulocalbin 2, EF-hand calcium binding domain                                      | L1 |
| 1434336_s_at | RCOR1  | REST corepressor 1                                                                    | L1 |
| 1421235_s_at | RECQL5 | RecQ protein-like 5                                                                   | L1 |
| 1433509_s_at | REEP1  | receptor accessory protein 1                                                          |    |
| 1430128_a_at | REEP6  | receptor accessory protein 6                                                          | L1 |
| 1417856_at   | RELB   | v-rel reticuloendotheliosis viral oncogene homolog B                                  | L1 |
| 1416216_at   | REPS1  | RALBP1 associated Eps domain containing 1                                             | L1 |
| 1454670_at   | RERE   | arginine-glutamic acid dipeptide (RE) repeats                                         | L1 |
| 1424321_at   | RFC4   | replication factor C (activator 1) 4, 37kDa                                           | L1 |
| 1434826_at   | RFESD  | Rieske (Fe-S) domain containing                                                       | L1 |
| 1418003_at   | RGCC   | regulator of cell cycle                                                               | L1 |
| 1417466_at   | RGS5   | regulator of G-protein signaling 5                                                    | L1 |
| 1438163_x_at | RHBDD2 | rhomoid domain containing 2                                                           | L1 |



|              |          |                                                                     |    |
|--------------|----------|---------------------------------------------------------------------|----|
| 1424819_a_at | RIC8A    | resistance to inhibitors of cholinesterase 8 homolog A (C. elegans) | L1 |
| 1450449_a_at | RILPL1   | Rab interacting lysosomal protein-like 1                            | L1 |
| 1422650_a_at | RIOK3    | RIO kinase 3 (yeast)                                                | L1 |
| 1460670_at   | RIOK3    | RIO kinase 3 (yeast)                                                | L1 |
| 1439273_at   | RIPK1    | receptor (TNFRSF)-interacting serine-threonine kinase 1             | L1 |
| 1450173_at   | RIPK2    | receptor-interacting serine-threonine kinase 2                      | L1 |
| 1428710_at   | RIT1     | Ras-like without CAAX 1                                             | L1 |
| 1423102_a_at | RNF10    | ring finger protein 10                                              | L1 |
| 1428415_at   | RNF113A2 | ring finger protein 113A2                                           |    |
| 1419368_a_at | RNF138   | ring finger protein 138, E3 ubiquitin protein ligase                | L1 |
| 1429425_at   | RNF139   | ring finger protein 139                                             |    |
| 1429321_at   | RNF149   | ring finger protein 149                                             | L1 |
| 1455586_at   | RNF168   | ring finger protein 168, E3 ubiquitin protein ligase                |    |
| 1432478_a_at | RNF19B   | ring finger protein 19B                                             | L1 |
| 1427273_at   | RNF214   | ring finger protein 214                                             | L1 |
| 1436305_at   | RNF217   | ring finger protein 217                                             | L1 |
| 1439447_x_at | RPL37A   | ribosomal protein L37a                                              | L1 |
| 1451077_at   | RPL5     | ribosomal protein L5                                                | L1 |
| 1418896_a_at | RPN2     | ribophorin II                                                       | L1 |
| 1434563_at   | RPS6KC1  | ribosomal protein S6 kinase, 52kDa, polypeptide 1                   | L1 |
| 1434619_at   | RPTOR    | regulatory associated protein of MTOR, complex 1                    | L1 |
| 1422562_at   | RRAD     | Ras-related associated with diabetes                                |    |
| 1434741_at   | RREB1    | ras responsive element binding protein 1                            |    |
| 1436058_at   | RSAD2    | radical S-adenosyl methionine domain containing 2                   |    |
| 1432579_at   | RSPH3    | radial spoke 3 homolog (Chlamydomonas)                              | L1 |
| 1451640_a_at | RSRC2    | arginine/serine-rich coiled-coil 2                                  | L1 |
| 1424095_at   | RTCA     | RNA 3'-terminal phosphate cyclase                                   |    |
| 1439573_at   | RTN4RL2  | reticulon 4 receptor-like 2                                         |    |

|              |        |                                                   |    |
|--------------|--------|---------------------------------------------------|----|
| 1426791_at   | RUSC2  | RUN and SH3 domain containing 2                   | L1 |
| 1416585_at   | RUVBL1 | RuvB-like 1 (E. coli)                             | L1 |
| 1454773_at   | RXRA   | retinoid X receptor, alpha                        | L1 |
| 1437173_at   | S1PR3  | sphingosine-1-phosphate receptor 3                | L1 |
| 1438900_at   | SACM1L | SAC1 suppressor of actin mutations 1-like (yeast) |    |
| 1440185_x_at | SAE1   | SUMO1 activating enzyme subunit 1                 | L1 |
| 1415718_at   | SAP30L | SAP30-like                                        | L1 |
| 1448426_at   | SARDH  | sarcosine dehydrogenase                           | L1 |
| 1416007_at   | SATB1  | SATB homeobox 1                                   | L1 |
| 1427132_at   | SBF2   | SET binding factor 2                              | L1 |
| 1443721_x_at | SBNO2  | strawberry notch homolog 2 (Drosophila)           | L1 |
| 1458308_at   | SBNO2  | strawberry notch homolog 2 (Drosophila)           | L1 |
| 1459999_at   | SCAF4  | SR-related CTD-associated factor 4                | L1 |
| 1438419_at   | SCAF8  | SR-related CTD-associated factor 8                |    |
| 1433520_at   | SCAP   | SREBF chaperone                                   | L1 |
| 1434740_at   | SCARF2 | scavenger receptor class F, member 2              | L1 |
| 1426510_at   | SCCPDH | saccharopine dehydrogenase (putative)             | L1 |
| 1415824_at   | SCD2   | stearoyl-Coenzyme A desaturase 2                  |    |
| 1428335_a_at | SCFD1  | sec1 family domain containing 1                   | L1 |
| 1441192_at   | SCLY   | selenocysteine lyase                              | L1 |
| 1436804_s_at | SCYL1  | SCY1-like 1 (S. cerevisiae)                       | L1 |
| 1451051_a_at | SCYL1  | SCY1-like 1 (S. cerevisiae)                       | L1 |
| 1428918_at   | SCYL3  | SCY1-like 3 (S. cerevisiae)                       |    |
| 1415943_at   | SDC1   | syndecan 1                                        | L1 |
| 1443832_s_at | SDPR   | serum deprivation response                        | L1 |
| 1416241_at   | SEC13  | SEC13 homolog (S. cerevisiae)                     | L1 |
| 1416059_at   | SEC23B | Sec23 homolog B (S. cerevisiae)                   | L1 |
| 1438121_at   | SEC24A | SEC24 family, member A (S. cerevisiae)            | L1 |
| 1453014_a_at | SEC31A | SEC31 homolog A (S. cerevisiae)                   | L1 |
| 1424926_at   | SEC63  | SEC63 homolog (S. cerevisiae)                     |    |

|              |           |                                                                                        |    |
|--------------|-----------|----------------------------------------------------------------------------------------|----|
| 1456120_at   | SECISBP2L | SECIS binding protein 2-like                                                           |    |
| 1425188_s_at | SEL1L     | sel-1 suppressor of lin-12-like (C. elegans)                                           | L1 |
| 1430692_a_at | SEL1L     | sel-1 suppressor of lin-12-like (C. elegans)                                           | L1 |
| 1420696_at   | SEMA3C    | sema domain, immunoglobulin domain (Ig), short basic domain, secreted, (semaphorin) 3C | L1 |
| 1453055_at   | SEMA6D    | sema domain, transmembrane domain (TM), and cytoplasmic domain, (semaphorin) 6D        | L1 |
| 1454877_at   | SERTAD4   | SERTA domain containing 4                                                              |    |
| 1428555_at   | SETD2     | SET domain containing 2                                                                | L1 |
| 1423750_a_at | SF1       | splicing factor 1                                                                      | L1 |
| 1456352_a_at | SF3B2     | splicing factor 3b, subunit 2, 145kDa                                                  | L1 |
| 1439058_at   | SFPQ      | splicing factor proline/glutamine-rich                                                 | L1 |
| 1438620_x_at | SFRP1     | secreted frizzled-related protein 1                                                    |    |
| 1424003_at   | SGK196    | protein kinase-like protein SgK196                                                     | L1 |
| 1415892_at   | SGPL1     | sphingosine-1-phosphate lyase 1                                                        | L1 |
| 1437977_at   | SGTB      | small glutamine-rich tetratricopeptide repeat (TPR)-containing, beta                   |    |
| 1433455_at   | SH2B3     | SH2B adaptor protein 3                                                                 | L1 |
| 1415886_at   | SH2D3C    | SH2 domain containing 3C                                                               | L1 |
| 1421922_at   | SH3BP5    | SH3-domain binding protein 5 (BTK-associated)                                          | L1 |
| 1416338_at   | SH3GL1    | SH3-domain GRB2-like 1                                                                 | L1 |
| 1432269_a_at | SH3KBP1   | SH3-domain kinase binding protein 1                                                    | L1 |
| 1448171_at   | SIAH2     | siah E3 ubiquitin protein ligase 2                                                     | L1 |
| 1438442_at   | SIKE1     | suppressor of IKBKE 1                                                                  | L1 |
| 1428916_s_at | SIRT5     | sirtuin 5                                                                              | L1 |
| 1422584_at   | SKIV2L    | superkiller viralicidic activity 2-like (S. cerevisiae)                                | L1 |
| 1460168_at   | SLBP      | stem-loop binding protein                                                              | L1 |
| 1458918_at   | SLC12A8   | solute carrier family 12 (potassium/chloride transporters), member 8                   | L1 |

|              |          |                                                                                             |    |
|--------------|----------|---------------------------------------------------------------------------------------------|----|
| 1427722_at   | SLC15A5  | solute carrier family 15, member 5                                                          |    |
| 1440569_at   | SLC16A10 | solute carrier family 16, member 10 (aromatic amino acid transporter)                       | L1 |
| 1418446_at   | SLC16A2  | solute carrier family 16, member 2 (thyroid hormone transporter)                            |    |
| 1417884_at   | SLC16A6  | solute carrier family 16, member 6 (monocarboxylic acid transporter 7)                      | L1 |
| 1457302_at   | SLC20A2  | solute carrier family 20 (phosphate transporter), member 2                                  |    |
| 1424308_at   | SLC24A3  | solute carrier family 24 (sodium/potassium/calcium exchanger), member 3                     | L1 |
| 1428440_at   | SLC25A12 | solute carrier family 25 (aspartate/glutamate carrier), member 12                           | L1 |
| 1451489_at   | SLC25A35 | solute carrier family 25, member 35                                                         |    |
| 1430542_a_at | SLC25A5  | solute carrier family 25 (mitochondrial carrier; adenine nucleotide translocator), member 5 | L1 |
| 1416316_at   | SLC27A2  | solute carrier family 27 (fatty acid transporter), member 2                                 |    |
| 1450639_at   | SLC28A2  | solute carrier family 28 (sodium-coupled nucleoside transporter), member 2                  | L1 |
| 1426599_a_at | SLC2A1   | solute carrier family 2 (facilitated glucose transporter), member 1                         |    |
| 1426600_at   | SLC2A1   | solute carrier family 2 (facilitated glucose transporter), member 1                         | L1 |
| 1419434_at   | SLC2A10  | solute carrier family 2 (facilitated glucose transporter), member 10                        |    |
| 1416639_at   | SLC2A5   | solute carrier family 2 (facilitated glucose/fructose transporter), member 5                |    |

|              |          |                                                                                    |    |
|--------------|----------|------------------------------------------------------------------------------------|----|
| 1450697_at   | SLC30A7  | solute carrier family 30 (zinc transporter), member 7                              |    |
| 1448769_at   | SLC35B1  | solute carrier family 35, member B1                                                | L1 |
| 1416548_at   | SLC35B4  | solute carrier family 35, member B4                                                | L1 |
| 1416549_at   | SLC35B4  | solute carrier family 35, member B4                                                | L1 |
| 1427294_a_at | SLC38A10 | solute carrier family 38, member 10                                                | L1 |
| 1427295_at   | SLC38A10 | solute carrier family 38, member 10                                                | L1 |
| 1417881_at   | SLC39A3  | solute carrier family 39 (zinc transporter), member 3                              | L1 |
| 1417061_at   | SLC40A1  | solute carrier family 40 (iron-regulated transporter), member 1                    |    |
| 1425439_a_at | SLC41A3  | solute carrier family 41, member 3                                                 | L1 |
| 1423865_at   | SLC44A1  | solute carrier family 44, member 1                                                 | L1 |
| 1433645_at   | SLC44A1  | solute carrier family 44, member 1                                                 | L1 |
| 1450409_a_at | SLC48A1  | solute carrier family 48 (heme transporter), member 1                              | L1 |
| 1450410_a_at | SLC48A1  | solute carrier family 48 (heme transporter), member 1                              | L1 |
| 1426432_a_at | SLC4A4   | solute carrier family 4, sodium bicarbonate cotransporter, member 4                |    |
| 1460541_at   | SLC7A6   | solute carrier family 7 (amino acid transporter light chain, y+L system), member 6 | L1 |
| 1440962_at   | SLC8A3   | solute carrier family 8 (sodium/calcium exchanger), member 3                       | L1 |
| 1433933_s_at | SLCO2B1  | solute carrier organic anion transporter family, member 2B1                        | L1 |
| 1451655_at   | SLFN13   | schlafen family member 13                                                          | L1 |
| 1456288_at   | SLFN5    | schlafen family member 5                                                           |    |
| 1419092_a_at | SLK      | STE20-like kinase                                                                  |    |
| 1437707_at   | SLMO1    | slowmo homolog 1 (Drosophila)                                                      |    |

|              |         |                                                                                                   |    |
|--------------|---------|---------------------------------------------------------------------------------------------------|----|
| 1456683_at   | SLTM    | SAFB-like, transcription modulator                                                                | L1 |
| 1459843_s_at | SMAD1   | SMAD family member 1                                                                              |    |
| 1420634_a_at | SMAD2   | SMAD family member 2                                                                              | L1 |
| 1422485_at   | SMAD4   | SMAD family member 4                                                                              | L1 |
| 1426804_at   | SMARCA4 | SWI/SNF related, matrix associated, actin dependent regulator of chromatin, subfamily a, member 4 | L1 |
| 1416045_a_at | SMARCB1 | SWI/SNF related, matrix associated, actin dependent regulator of chromatin, subfamily b, member 1 | L1 |
| 1418467_at   | SMARCD3 | SWI/SNF related, matrix associated, actin dependent regulator of chromatin, subfamily d, member 3 | L1 |
| 1417832_at   | SMC1A   | structural maintenance of chromosomes 1A                                                          | L1 |
| 1429658_a_at | SMC2    | structural maintenance of chromosomes 2                                                           | L1 |
| 1417736_at   | SMC6    | structural maintenance of chromosomes 6                                                           |    |
| 1429017_at   | SMCR8   | Smith-Magenis syndrome chromosome region, candidate 8                                             | L1 |
| 1457262_at   | SMG1    | smg-1 homolog, phosphatidylinositol 3-kinase-related kinase (C. elegans)                          |    |
| 1427048_at   | SMO     | smoothened, frizzled family receptor                                                              |    |
| 1427049_s_at | SMO     | smoothened, frizzled family receptor                                                              |    |
| 1448321_at   | SMOC1   | SPARC related modular calcium binding 1                                                           | L1 |
| 1415935_at   | SMOC2   | SPARC related modular calcium binding 2                                                           | L1 |
| 1448621_a_at | SMPD1   | sphingomyelin phosphodiesterase 1, acid lysosomal                                                 | L1 |
| 1428395_at   | SMURF1  | SMAD specific E3 ubiquitin protein ligase 1                                                       | L1 |

|              |         |                                                                                 |    |
|--------------|---------|---------------------------------------------------------------------------------|----|
| 1424760_a_at | SMYD2   | SET and MYND domain containing 2                                                | L1 |
| 1423745_at   | SNAP47  | synaptosomal-associated protein, 47kDa                                          | L1 |
| 1417788_at   | SNCG    | synuclein, gamma (breast cancer-specific protein 1)                             |    |
| 1447993_a_at | Snhg10  | small nucleolar RNA host gene (non-protein coding) 10                           | L1 |
| 1452789_at   | SNN     | stannin                                                                         | L1 |
| 1430041_at   | SNRNP35 | small nuclear ribonucleoprotein 35kDa (U11/U12)                                 |    |
| 1452680_at   | SNRPD2  | small nuclear ribonucleoprotein D2 polypeptide 16.5kDa                          |    |
| 1420371_at   | SNTB2   | syntrophin, beta 2 (dystrophin-associated protein A1, 59kDa, basic component 2) |    |
| 1424276_at   | SNX16   | sorting nexin 16                                                                | L1 |
| 1433614_at   | SNX27   | sorting nexin family member 27                                                  | L1 |
| 1425148_a_at | SNX6    | sorting nexin 6                                                                 | L1 |
| 1423076_at   | SNX9    | sorting nexin 9                                                                 | L1 |
| 1417695_a_at | SOAT1   | sterol O-acyltransferase 1                                                      | L1 |
| 1416576_at   | SOCS3   | suppressor of cytokine signaling 3                                              | L1 |
| 1455634_at   | SON     | SON DNA binding protein                                                         |    |
| 1419358_at   | SORCS2  | sortilin-related VPS10 domain containing receptor 2                             |    |
| 1437676_at   | SPAG9   | sperm associated antigen 9                                                      | L1 |
| 1416114_at   | SPARCL1 | SPARC-like 1 (hevin)                                                            | L1 |
| 1428300_at   | SPECC1L | sperm antigen with calponin homology and coiled-coil domains 1-like             | L1 |
| 1451036_at   | SPG21   | spastic paraplegia 21 (autosomal recessive, Mast syndrome)                      | L1 |
| 1454962_at   | SPIRE1  | spire homolog 1 (Drosophila)                                                    | L1 |
| 1420150_at   | SPSB1   | splA/ryanodine receptor domain and SOCS box containing 1                        | L1 |
| 1428472_at   | SPSB1   | splA/ryanodine receptor domain and SOCS box containing 1                        | L1 |
| 1423574_s_at | SRD5A3  | steroid 5 alpha-reductase 3                                                     | L1 |
| 1456691_s_at | SRD5A3  | steroid 5 alpha-reductase 3                                                     | L1 |

|              |         |                                                                                            |    |
|--------------|---------|--------------------------------------------------------------------------------------------|----|
| 1418256_at   | SRF     | serum response factor (c-fos serum response element-binding transcription factor)          | L1 |
| 1456355_s_at | SRRD    | SRR1 domain containing                                                                     |    |
| 1452439_s_at | SRSF2   | serine/arginine-rich splicing factor 2                                                     | L1 |
| 1447898_s_at | SRSF6   | serine/arginine-rich splicing factor 6                                                     | L1 |
| 1419942_at   | SRXN1   | sulfiredoxin 1                                                                             |    |
| 1425351_at   | SRXN1   | sulfiredoxin 1                                                                             | L1 |
| 1426875_s_at | SRXN1   | sulfiredoxin 1                                                                             | L1 |
| 1451680_at   | SRXN1   | sulfiredoxin 1                                                                             | L1 |
| 1419360_a_at | SS18    | synovial sarcoma translocation, chromosome 18                                              | L1 |
| 1438253_at   | SSH1    | slingshot homolog 1 (Drosophila)                                                           | L1 |
| 1421915_a_at | ST3GAL3 | ST3 beta-galactoside alpha-2,3-sialyltransferase 3                                         | L1 |
| 1450406_a_at | ST3GAL3 | ST3 beta-galactoside alpha-2,3-sialyltransferase 3                                         | L1 |
| 1431962_a_at | STAMBP  | STAM binding protein                                                                       | L1 |
| 1452604_at   | STARD13 | StAR-related lipid transfer (START) domain containing 13                                   | L1 |
| 1421469_a_at | STAT5A  | signal transducer and activator of transcription 5A                                        | L1 |
| 1422102_a_at | STAT5B  | signal transducer and activator of transcription 5B                                        | L1 |
| 1448320_at   | STIM1   | stromal interaction molecule 1                                                             | L1 |
| 1426343_at   | STT3B   | STT3, subunit of the oligosaccharyltransferase complex, homolog B ( <i>S. cerevisiae</i> ) | L1 |
| 1416580_a_at | STUB1   | STIP1 homology and U-box containing protein 1, E3 ubiquitin protein ligase                 | L1 |
| 1423038_at   | STX6    | syntaxin 6                                                                                 | L1 |
| 1431646_a_at | STX6    | syntaxin 6                                                                                 | L1 |
| 1427441_a_at | SUCLG2  | succinate-CoA ligase, GDP-forming, beta subunit                                            | L1 |
| 1450024_at   | SUFU    | suppressor of fused homolog (Drosophila)                                                   |    |
| 1447602_x_at | SULF2   | sulfatase 2                                                                                |    |



|              |         |                                                                                  |    |
|--------------|---------|----------------------------------------------------------------------------------|----|
| 1415782_at   | SUMO2   | SMT3 suppressor of mif two 3 homolog 2 (yeast)                                   | L1 |
| 1426666_a_at | SUN1    | Sad1 and UNC84 domain containing 1                                               | L1 |
| 1416213_x_at | SURF4   | surfeit 4                                                                        | L1 |
| 1436797_a_at | SURF4   | surfeit 4                                                                        | L1 |
| 1428654_at   | SWT1    | SWT1 RNA endoribonuclease homolog ( <i>S. cerevisiae</i> )                       | L1 |
| 1460230_at   | SYN2    | synapsin II                                                                      |    |
| 1427982_s_at | SYNE2   | spectrin repeat containing, nuclear envelope 2                                   |    |
| 1438585_at   | SYNE2   | spectrin repeat containing, nuclear envelope 2                                   |    |
| 1419289_a_at | SYNGR1  | synaptogyrin 1                                                                   |    |
| 1436334_at   | SYNJ1   | synaptojanin 1                                                                   | L1 |
| 1452344_at   | SYNJ2   | synaptojanin 2                                                                   |    |
| 1441927_at   | SYT7    | synaptotagmin VII                                                                | L1 |
| 1428070_at   | SYVN1   | synovial apoptosis inhibitor 1, synoviolin                                       | L1 |
| 1443609_s_at | SYVN1   | synovial apoptosis inhibitor 1, synoviolin                                       | L1 |
| 1425745_a_at | TACC2   | transforming, acidic coiled-coil containing protein 2                            | L1 |
| 1417467_a_at | TADA3   | transcriptional adaptor 3                                                        | L1 |
| 1447417_at   | TAF1    | TAF1 RNA polymerase II, TATA box binding protein (TBP)-associated factor, 250kDa |    |
| 1431345_a_at | TAF1B   | TATA box binding protein (TBP)-associated factor, RNA polymerase I, B, 63kDa     | L1 |
| 1452438_s_at | TAF4    | TAF4 RNA polymerase II, TATA box binding protein (TBP)-associated factor, 135kDa | L1 |
| 1422778_at   | TAF9    | TAF9 RNA polymerase II, TATA box binding protein (TBP)-associated factor, 32kDa  | L1 |
| 1452714_at   | TANC1   | tetratricopeptide repeat, ankyrin repeat and coiled-coil containing 1            | L1 |
| 1416062_at   | TBC1D15 | TBC1 domain family, member 15                                                    |    |
| 1423659_a_at | TBC1D17 | TBC1 domain family, member 17                                                    | L1 |
| 1426899_at   | TBC1D23 | TBC1 domain family, member 23                                                    | L1 |

|              |         |                                                                                 |    |
|--------------|---------|---------------------------------------------------------------------------------|----|
| 1428508_at   | TBC1D2B | TBC1 domain family, member 2B                                                   | L1 |
| 1428598_at   | TBC1D7  | TBC1 domain family, member 7                                                    | L1 |
| 1428596_at   | TBC1D9B | TBC1 domain family, member 9B (with GRAM domain)                                | L1 |
| 1428282_at   | TBCE    | tubulin folding cofactor E                                                      | L1 |
| 1445571_at   | TBK1    | TANK-binding kinase 1                                                           | L1 |
| 1429974_at   | TBX18   | T-box 18                                                                        | L1 |
| 1422545_at   | TBX2    | T-box 2                                                                         | L1 |
| 1424531_a_at | TCEA3   | transcription elongation factor A (SII), 3                                      | L1 |
| 1434117_at   | TCEB3   | transcription elongation factor B (SIII), polypeptide 3 (110kDa, elongin A)     | L1 |
| 1417447_at   | TCF21   | transcription factor 21                                                         | L1 |
| 1437204_a_at | TCF25   | transcription factor 25 (basic helix-loop-helix)                                | L1 |
| 1437205_at   | TCF25   | transcription factor 25 (basic helix-loop-helix)                                | L1 |
| 1424068_at   | TCTA    | T-cell leukemia translocation altered                                           | L1 |
| 1452264_at   | TENC1   | tensin like C1 domain containing phosphatase (tensin 2)                         | L1 |
| 1455651_at   | TERF2   | telomeric repeat binding factor 2                                               | L1 |
| 1426049_a_at | TERF2IP | telomeric repeat binding factor 2, interacting protein                          | L1 |
| 1450662_at   | TESK1   | testis-specific kinase 1                                                        | L1 |
| 1448224_at   | TFAM    | transcription factor A, mitochondrial                                           | L1 |
| 1448977_at   | TFAP2C  | transcription factor AP-2 gamma (activating enhancer binding protein 2 gamma)   | L1 |
| 1438053_at   | TFG     | TRK-fused gene                                                                  | L1 |
| 1448976_at   | TFIP11  | tuftelin interacting protein 11                                                 | L1 |
| 1459994_x_at | TFR2    | transferrin receptor 2                                                          |    |
| 1415871_at   | TGFBI   | transforming growth factor, beta-induced, 68kDa                                 | L1 |
| 1420895_at   | TGFBR1  | transforming growth factor, beta receptor 1                                     | L1 |
| 1421355_at   | TGM3    | transglutaminase 3 (E polypeptide, protein-glutamine-gamma-glutamyltransferase) | L1 |
| 1416428_at   | THAP11  | THAP domain containing 11                                                       | L1 |

|              |          |                                                                          |    |
|--------------|----------|--------------------------------------------------------------------------|----|
| 1424052_at   | THAP4    | THAP domain containing 4                                                 | L1 |
| 1425244_a_at | THEG     | theg spermatid protein                                                   | L1 |
| 1426997_at   | THRA     | thyroid hormone receptor, alpha                                          |    |
| 1427408_a_at | THRAP3   | thyroid hormone receptor associated protein 3                            | L1 |
| 1438769_a_at | THYN1    | thymocyte nuclear protein 1                                              | L1 |
| 1419089_at   | TIMP3    | TIMP metalloproteinase inhibitor 3                                       | L1 |
| 1451587_a_at | TIPRL    | TIP41, TOR signaling pathway regulator-like ( <i>S. cerevisiae</i> )     | L1 |
| 1434033_at   | TLE1     | transducin-like enhancer of split 1 (E(sp1) homolog, <i>Drosophila</i> ) |    |
| 1448402_at   | TLN1     | talin 1                                                                  |    |
| 1435700_at   | TLN2     | talin 2                                                                  |    |
| 1426254_at   | TM2D1    | TM2 domain containing 1                                                  | L1 |
| 1439454_x_at | TM2D2    | TM2 domain containing 2                                                  | L1 |
| 1451134_a_at | TM2D2    | TM2 domain containing 2                                                  | L1 |
| 1439925_at   | TM4SF1   | transmembrane 4 L six family member 1                                    | L1 |
| 1423204_at   | TM9SF4   | transmembrane 9 superfamily protein member 4                             | L1 |
| 1423205_at   | TM9SF4   | transmembrane 9 superfamily protein member 4                             | L1 |
| 1426711_at   | TMCO3    | transmembrane and coiled-coil domains 3                                  | L1 |
| 1435883_at   | TMCO7    | transmembrane and coiled-coil domains 7                                  | L1 |
| 1426649_at   | TMEFF1   | transmembrane protein with EGF-like and two follistatin-like domains 1   | L1 |
| 1451315_at   | TMEM101  | transmembrane protein 101                                                |    |
| 1452290_at   | TMEM106B | transmembrane protein 106B                                               | L1 |
| 1427324_at   | TMEM120B | transmembrane protein 120B                                               | L1 |
| 1415715_at   | TMEM129  | transmembrane protein 129                                                | L1 |
| 1421993_a_at | TMEM134  | transmembrane protein 134                                                | L1 |
| 1433017_at   | TMEM159  | transmembrane protein 159                                                | L1 |
| 1415741_at   | TMEM165  | transmembrane protein 165                                                |    |
| 1459997_s_at | TMEM17   | transmembrane protein 17                                                 | L1 |
| 1452134_at   | TMEM175  | transmembrane protein 175                                                | L1 |
| 1451341_s_at | TMEM189  | transmembrane protein 189                                                | L1 |
| 1423707_at   | TMEM50B  | transmembrane protein 50B                                                | L1 |
| 1429337_at   | TMEM87B  | transmembrane protein 87B                                                | L1 |

|              |                   |                                                               |    |
|--------------|-------------------|---------------------------------------------------------------|----|
| 1417874_at   | TMEM9B            | TMEM9 domain family, member B                                 | L1 |
| 1438556_a_at | TMOD3             | tropomodulin 3 (ubiquitous)                                   | L1 |
| 1448147_at   | TNFRSF19          | tumor necrosis factor receptor superfamily, member 19         | L1 |
| 1442590_at   | TNFRSF22/TNFRSF23 | tumor necrosis factor receptor superfamily, member 22         | L1 |
| 1448298_at   | TNK2              | tyrosine kinase, non-receptor, 2                              | L1 |
| 1453124_at   | TNPO3             | transportin 3                                                 | L1 |
| 1431776_at   | TOB2              | transducer of ERBB2, 2                                        | L1 |
| 1426084_a_at | TOR1AIP1          | torsin A interacting protein 1                                | L1 |
| 1423783_at   | TOR2A             | torsin family 2, member A                                     | L1 |
| 1426538_a_at | TP53              | tumor protein p53                                             |    |
| 1433937_at   | TP53BP2           | tumor protein p53 binding protein, 2                          | L1 |
| 1428189_at   | TPGS2             | tubulin polyglutamylase complex subunit 2                     | L1 |
| 1449997_at   | TPM3              | tropomyosin 3                                                 |    |
| 1433883_at   | TPM4              | tropomyosin 4                                                 |    |
| 1448313_at   | TPP1              | tripeptidyl peptidase I                                       | L1 |
| 1426949_s_at | TPR               | translocated promoter region, nuclear basket protein          | L1 |
| 1456651_a_at | TPR               | translocated promoter region, nuclear basket protein          | L1 |
| 1429117_at   | TRADD             | TNFRSF1A-associated via death domain                          | L1 |
| 1446940_at   | TRAF6             | TNF receptor-associated factor 6, E3 ubiquitin protein ligase | L1 |
| 1424320_a_at | TRAF7             | TNF receptor-associated factor 7, E3 ubiquitin protein ligase | L1 |
| 1428178_s_at | TRAPPC6B          | trafficking protein particle complex 6B                       | L1 |
| 1424162_at   | TRIM29            | tripartite motif containing 29                                | L1 |
| 1427476_a_at | TRIM32            | tripartite motif containing 32                                | L1 |
| 1433745_at   | TRIO              | trio Rho guanine nucleotide exchange factor                   | L1 |
| 1457492_at   | TRIO              | trio Rho guanine nucleotide exchange factor                   | L1 |
| 1423899_at   | TRIP12            | thyroid hormone receptor interactor 12                        | L1 |
| 1451158_at   | TRIP12            | thyroid hormone receptor interactor 12                        |    |

|              |         |                                                                                             |    |
|--------------|---------|---------------------------------------------------------------------------------------------|----|
| 1449041_a_at | TRIP6   | thyroid hormone receptor interactor 6                                                       | L1 |
| 1424333_at   | TRMT10C | tRNA methyltransferase 10 homolog C<br>( <i>S. cerevisiae</i> )                             | L1 |
| 1426016_a_at | TRO     | trophinin                                                                                   | L1 |
| 1457164_at   | TRPA1   | transient receptor potential cation<br>channel, subfamily A, member 1                       |    |
| 1460720_at   | TRPC4AP | transient receptor potential cation<br>channel, subfamily C, member 4<br>associated protein | L1 |
| 1452615_s_at | TRPT1   | tRNA phosphotransferase 1                                                                   | L1 |
| 1428281_at   | TRUB1   | TruB pseudouridine (psi) synthase<br>homolog 1 ( <i>E. coli</i> )                           | L1 |
| 1452105_a_at | TSC2    | tuberous sclerosis 2                                                                        | L1 |
| 1416009_at   | TSPAN3  | tetraspanin 3                                                                               | L1 |
| 1416994_at   | TTC1    | tetratricopeptide repeat domain 1                                                           | L1 |
| 1435456_at   | TTC28   | tetratricopeptide repeat domain 28                                                          | L1 |
| 1416484_at   | TTC3    | tetratricopeptide repeat domain 3                                                           | L1 |
| 1427446_s_at | TTN     | titin                                                                                       |    |
| 1416311_s_at | TUBA3E  | tubulin, alpha 3e                                                                           | L1 |
| 1455868_a_at | TUBGCP2 | tubulin, gamma complex associated<br>protein 2                                              | L1 |
| 1426707_at   | TUBGCP3 | tubulin, gamma complex associated<br>protein 3                                              | L1 |
| 1440282_at   | TULP4   | tubby like protein 4                                                                        |    |
| 1421662_a_at | TUSC3   | tumor suppressor candidate 3                                                                | L1 |
| 1420873_at   | TWF1    | twinfilin, actin-binding protein,<br>homolog 1 ( <i>Drosophila</i> )                        |    |
| 1418733_at   | TWIST1  | twist homolog 1 ( <i>Drosophila</i> )                                                       |    |
| 1448782_at   | TXNDC11 | thioredoxin domain containing 11                                                            | L1 |
| 1424486_a_at | TXNRD1  | thioredoxin reductase 1                                                                     | L1 |
| 1429971_at   | TXNRD2  | thioredoxin reductase 2                                                                     |    |
| 1417306_at   | TYK2    | tyrosine kinase 2                                                                           |    |
| 1434300_at   | U2SURP  | U2 snRNP-associated SURP domain<br>containing                                               |    |
| 1448116_at   | UBA1    | ubiquitin-like modifier activating<br>enzyme 1                                              | L1 |

|              |         |                                                                   |    |
|--------------|---------|-------------------------------------------------------------------|----|
| 1416280_at   | UBA2    | ubiquitin-like modifier activating enzyme 2                       | L1 |
| 1424281_at   | UBAP2   | ubiquitin associated protein 2                                    | L1 |
| 1429475_at   | UBASH3B | ubiquitin associated and SH3 domain containing B                  | L1 |
| 1419762_at   | UBD     | ubiquitin D                                                       |    |
| 1448772_at   | UBE2A   | ubiquitin-conjugating enzyme E2A                                  | L1 |
| 1416477_at   | UBE2D2  | ubiquitin-conjugating enzyme E2D 2                                | L1 |
| 1453189_at   | UBE2I   | ubiquitin-conjugating enzyme E2I                                  |    |
| 1435384_at   | UBE2N   | ubiquitin-conjugating enzyme E2N                                  |    |
| 1425206_a_at | UBE3A   | ubiquitin protein ligase E3A                                      |    |
| 1416848_at   | UBL5    | ubiquitin-like 5                                                  |    |
| 1454668_at   | UBR4    | ubiquitin protein ligase E3 component n-recognin 4                | L1 |
| 1444327_at   | UBR5    | ubiquitin protein ligase E3 component n-recognin 5                |    |
| 1460304_a_at | UBTF    | upstream binding transcription factor, RNA polymerase I           |    |
| 1449855_s_at | UCHL3   | ubiquitin carboxyl-terminal esterase L3 (ubiquitin thiolesterase) | L1 |
| 1448604_at   | UCK2    | uridine-cytidine kinase 2                                         | L1 |
| 1447046_at   | UCP2    | uncoupling protein 2 (mitochondrial, proton carrier)              | L1 |
| 1426261_s_at | UGT1A6  | UDP glucuronosyltransferase 1 family, polypeptide A6              | L1 |
| 1448370_at   | ULK1    | unc-51-like kinase 1 (C. elegans)                                 | L1 |
| 1415866_at   | UNC45A  | unc-45 homolog A (C. elegans)                                     | L1 |
| 1429844_at   | UPK3BL  | uroplakin 3B-like                                                 | L1 |
| 1454841_at   | URB1    | URB1 ribosome biogenesis 1 homolog (S. cerevisiae)                | L1 |
| 1430494_at   | URGCP   | upregulator of cell proliferation                                 |    |
| 1433498_at   | URGCP   | upregulator of cell proliferation                                 | L1 |
| 1450892_a_at | USP4    | ubiquitin specific peptidase 4 (proto-oncogene)                   | L1 |
| 1435901_at   | USP40   | ubiquitin specific peptidase 40                                   | L1 |
| 1424056_at   | USP48   | ubiquitin specific peptidase 48                                   | L1 |

|              |        |                                                                  |    |
|--------------|--------|------------------------------------------------------------------|----|
| 1429937_at   | UTP23  | UTP23, small subunit (SSU) processome component, homolog (yeast) | L1 |
| 1426892_at   | UTRN   | utrophin                                                         |    |
| 1420624_a_at | VAMP8  | vesicle-associated membrane protein 8 (endobrevin)               |    |
| 1427894_at   | VASN   | vasorin                                                          |    |
| 1419417_at   | VEGFC  | vascular endothelial growth factor C                             | L1 |
| 1440739_at   | VEGFC  | vascular endothelial growth factor C                             | L1 |
| 1417900_a_at | VLDLR  | very low density lipoprotein receptor                            |    |
| 1440146_at   | VPS13A | vacuolar protein sorting 13 homolog A ( <i>S. cerevisiae</i> )   |    |
| 1416254_a_at | VPS16  | vacuolar protein sorting 16 homolog ( <i>S. cerevisiae</i> )     | L1 |
| 1421050_at   | VPS25  | vacuolar protein sorting 25 homolog ( <i>S. cerevisiae</i> )     | L1 |
| 1427933_at   | VPS33B | vacuolar protein sorting 33 homolog B (yeast)                    |    |
| 1415784_at   | VPS35  | vacuolar protein sorting 35 homolog ( <i>S. cerevisiae</i> )     |    |
| 1429363_at   | VPS37A | vacuolar protein sorting 37 homolog A ( <i>S. cerevisiae</i> )   | L1 |
| 1417510_at   | VPS4A  | vacuolar protein sorting 4 homolog A ( <i>S. cerevisiae</i> )    | L1 |
| 1454825_at   | VPS51  | vacuolar protein sorting 51 homolog ( <i>S. cerevisiae</i> )     | L1 |
| 1447894_x_at | VPS52  | vacuolar protein sorting 52 homolog ( <i>S. cerevisiae</i> )     | L1 |
| 1442699_at   | VPS54  | vacuolar protein sorting 54 homolog ( <i>S. cerevisiae</i> )     |    |
| 1456810_at   | VPS54  | vacuolar protein sorting 54 homolog ( <i>S. cerevisiae</i> )     |    |
| 1455050_at   | VSTM4  | V-set and transmembrane domain containing 4                      |    |
| 1420484_a_at | VTN    | vitronectin                                                      | L1 |
| 1455098_a_at | VTN    | vitronectin                                                      |    |
| 1415799_at   | WBP11  | WW domain binding protein 11                                     | L1 |
| 1430987_s_at | WBP11  | WW domain binding protein 11                                     | L1 |

|              |         |                                                                        |    |
|--------------|---------|------------------------------------------------------------------------|----|
| 1427456_at   | WDFY3   | WD repeat and FYVE domain containing 3                                 |    |
| 1423054_at   | WDR1    | WD repeat domain 1                                                     | L1 |
| 1451728_at   | WDR13   | WD repeat domain 13                                                    | L1 |
| 1453554_a_at | WDR33   | WD repeat domain 33                                                    | L1 |
| 1429174_at   | WDR34   | WD repeat domain 34                                                    | L1 |
| 1415770_at   | WDR6    | WD repeat domain 6                                                     | L1 |
| 1455940_x_at | WDR6    | WD repeat domain 6                                                     | L1 |
| 1444689_at   | WDR67   | WD repeat domain 67                                                    |    |
| 1434793_at   | WDR78   | WD repeat domain 78                                                    |    |
| 1426767_at   | WDR90   | WD repeat domain 90                                                    |    |
| 1424917_a_at | WIP1    | WD repeat domain, phosphoinositide interacting 1                       |    |
| 1419015_at   | WISP2   | WNT1 inducible signaling pathway protein 2                             |    |
| 1454805_at   | WTAP    | Wilms tumor 1 associated protein                                       | L1 |
| 1448145_at   | WWP2    | WW domain containing E3 ubiquitin protein ligase 2                     | L1 |
| 1448278_at   | XAB2    | XPA binding protein 2                                                  | L1 |
| 1420011_s_at | XBP1    | X-box binding protein 1                                                | L1 |
| 1420012_at   | XBP1    | X-box binding protein 1                                                |    |
| 1420886_a_at | XBP1    | X-box binding protein 1                                                | L1 |
| 1456088_at   | XIAP    | X-linked inhibitor of apoptosis                                        | L1 |
| 1439411_a_at | XPO7    | exportin 7                                                             | L1 |
| 1426993_at   | XPR1    | xenotropic and polytropic retrovirus receptor 1                        | L1 |
| 1453950_a_at | XRCC2   | X-ray repair complementing defective repair in Chinese hamster cells 2 | L1 |
| 1430134_a_at | YARS2   | tyrosyl-tRNA synthetase 2, mitochondrial                               | L1 |
| 1453414_at   | YPEL2   | yippee-like 2 (Drosophila)                                             |    |
| 1427638_at   | ZBTB16  | zinc finger and BTB domain containing 16                               |    |
| 1416224_at   | ZBTB17  | zinc finger and BTB domain containing 17                               | L1 |
| 1448705_at   | ZBTB22  | zinc finger and BTB domain containing 22                               | L1 |
| 1426361_at   | ZC3H11A | zinc finger CCCH-type containing 11A                                   | L1 |



|              |                 |                                              |    |
|--------------|-----------------|----------------------------------------------|----|
| 1430568_at   | ZC3H13          | zinc finger CCCH-type containing 13          | L1 |
| 1427876_at   | ZC3H15          | zinc finger CCCH-type containing 15          | L1 |
| 1428682_at   | ZC3H6           | zinc finger CCCH-type containing 6           |    |
| 1437616_x_at | ZDHHC14         | zinc finger, DHHC-type containing 14         | L1 |
| 1421115_a_at | ZDHHC16         | zinc finger, DHHC-type containing 16         | L1 |
| 1452274_at   | ZFAND3          | zinc finger, AN1-type domain 3               | L1 |
| 1422031_a_at | ZFAND6          | zinc finger, AN1-type domain 6               |    |
| 1420944_at   | ZFP185          | zinc finger protein 185                      | L1 |
| 1440890_a_at | ZFP809          | zinc finger protein 809                      |    |
| 1449126_at   | ZFP90           | zinc finger protein 90 homolog<br>(mouse)    |    |
| 1441348_at   | ZFP955A/ZFP955B | zinc finger protein 955B                     |    |
| 1424892_at   | ZKSCAN5         | zinc finger with KRAB and SCAN<br>domains 5  | L1 |
| 1445543_at   | ZMYM5           | zinc finger, MYM-type 5                      |    |
| 1426532_at   | ZMYND11         | zinc finger, MYND-type containing 11         |    |
| 1429415_at   | ZMYND8          | zinc finger, MYND-type containing 8          | L1 |
| 1453034_at   | ZNF251          | zinc finger protein 251                      |    |
| 1419165_at   | ZNF260          | zinc finger protein 260                      | L1 |
| 1452045_at   | ZNF281          | zinc finger protein 281                      | L1 |
| 1451151_s_at | ZNF410          | zinc finger protein 410                      |    |
| 1449510_at   | ZNF467          | zinc finger protein 467                      | L1 |
| 1434088_at   | ZNF496          | zinc finger protein 496                      | L1 |
| 1423836_at   | ZNF503          | zinc finger protein 503                      | L1 |
| 1437483_at   | ZNF513          | zinc finger protein 513                      | L1 |
| 1438079_at   | ZNF627          | zinc finger protein 627                      | L1 |
| 1419984_s_at | ZNF644          | zinc finger protein 644                      | L1 |
| 1435481_at   | ZNF653          | zinc finger protein 653                      | L1 |
| 1429217_at   | ZNF655          | zinc finger protein 655                      | L1 |
| 1451323_at   | ZNF7            | zinc finger protein 7                        |    |
| 1438026_at   | ZNF778          | zinc finger protein 778                      | L1 |
| 1416370_at   | ZSCAN21         | zinc finger and SCAN domain<br>containing 21 | L1 |
| 1417240_at   | ZYX             | zyxin                                        | L1 |
| 1421653_a_at |                 |                                              |    |

|              |  |  |    |
|--------------|--|--|----|
| 1421754_at   |  |  |    |
| 1422426_at   |  |  | L1 |
| 1425421_at   |  |  | L1 |
| 1425424_at   |  |  | L1 |
| 1426113_x_at |  |  | L1 |
| 1427437_at   |  |  |    |
| 1427455_x_at |  |  |    |
| 1427653_at   |  |  |    |
| 1427809_at   |  |  | L1 |
| 1428301_at   |  |  |    |
| 1429381_x_at |  |  |    |
| 1430308_at   |  |  | L1 |
| 1430404_at   |  |  |    |
| 1430945_at   |  |  | L1 |
| 1435150_at   |  |  | L1 |
| 1437073_x_at |  |  |    |
| 1438049_at   |  |  | L1 |
| 1438068_at   |  |  |    |
| 1438257_at   |  |  |    |
| 1438370_x_at |  |  | L1 |
| 1438783_at   |  |  |    |
| 1440078_at   |  |  | L1 |
| 1440360_at   |  |  | L1 |
| 1440494_at   |  |  | L1 |
| 1440742_at   |  |  | L1 |
| 1441147_at   |  |  |    |
| 1441247_at   |  |  |    |
| 1441386_at   |  |  |    |
| 1441505_at   |  |  |    |
| 1441627_at   |  |  |    |
| 1441718_at   |  |  | L1 |
| 1442217_at   |  |  |    |
| 1442463_at   |  |  |    |
| 1442505_at   |  |  | L1 |
| 1442535_at   |  |  |    |
| 1442992_at   |  |  |    |
| 1443007_at   |  |  | L1 |
| 1443010_at   |  |  |    |
| 1443241_at   |  |  | L1 |
| 1443249_at   |  |  | L1 |
| 1443293_at   |  |  | L1 |

|              |  |  |    |
|--------------|--|--|----|
| 1443302_at   |  |  |    |
| 1443325_at   |  |  | L1 |
| 1444192_at   |  |  |    |
| 1444490_at   |  |  |    |
| 1444750_at   |  |  |    |
| 1444856_at   |  |  |    |
| 1444920_at   |  |  | L1 |
| 1445144_at   |  |  |    |
| 1445461_at   |  |  | L1 |
| 1445518_at   |  |  | L1 |
| 1445579_at   |  |  |    |
| 1445666_at   |  |  | L1 |
| 1445807_at   |  |  |    |
| 1445935_at   |  |  | L1 |
| 1445958_at   |  |  | L1 |
| 1446040_at   |  |  | L1 |
| 1446411_at   |  |  | L1 |
| 1446530_at   |  |  |    |
| 1446593_at   |  |  | L1 |
| 1446598_at   |  |  |    |
| 1446850_at   |  |  | L1 |
| 1446914_at   |  |  |    |
| 1447064_at   |  |  | L1 |
| 1447147_at   |  |  |    |
| 1447156_at   |  |  |    |
| 1447179_at   |  |  | L1 |
| 1447316_at   |  |  | L1 |
| 1448018_at   |  |  | L1 |
| 1452405_x_at |  |  | L1 |
| 1452463_x_at |  |  |    |
| 1452731_x_at |  |  |    |
| 1454002_at   |  |  | L1 |
| 1455569_at   |  |  | L1 |
| 1455930_at   |  |  |    |
| 1456453_at   |  |  |    |
| 1456677_at   |  |  | L1 |
| 1456787_at   |  |  | L1 |
| 1456880_at   |  |  | L1 |
| 1457141_at   |  |  |    |
| 1457173_at   |  |  | L1 |
| 1457348_at   |  |  | L1 |

|            |  |  |    |
|------------|--|--|----|
| 1457483_at |  |  |    |
| 1457750_at |  |  |    |
| 1457859_at |  |  |    |
| 1457934_at |  |  | L1 |
| 1458065_at |  |  |    |
| 1458257_at |  |  | L1 |
| 1458288_at |  |  | L1 |
| 1458457_at |  |  | L1 |
| 1458589_at |  |  | L1 |
| 1458703_at |  |  |    |
| 1458850_at |  |  | L1 |
| 1458980_at |  |  | L1 |
| 1459358_at |  |  | L1 |
| 1459733_at |  |  |    |
| 1459968_at |  |  | L1 |
| 1460117_at |  |  |    |
| 1460133_at |  |  | L1 |
